# Supplementary material for: Efficient synthesis of bisulfide-bridged bicyclopeptides by intramolecular photoinduced electron transfer cycloreaction
Source: Royal Society of Chemistry journal article supplement (doi:10.1039/d2nj00583b), 2022-01-01

## Supporting Information

# Efficient synthesis of bisulfide-bridged bicyclopeptides by intramolecular photoinduced electron transfer cycloreaction

Shimei Xiao<sup>†</sup>, Lishuang Zhao<sup>†</sup>, Rui Yan, Huanli Zhang, Jiawen Liu, Zhiqiang Wang\*, Guanghui Tan\*,

Yingxue Jin\*

- a. Key Laboratory for Photonic and Electronic Bandgap Materials, Ministry of Education, College of Chemistry & Chemical Engineering, Harbin Normal University, Harbin, 150025, China.

<sup>†</sup> These authors contributed equally to this work

\***Corresponding author.** E-mail: wzq70402@163.com (Z. Q. Wang), jyxprof@163.com (Y. X. Jin), tgh.123@163.com (G. H. Tan)

### Contents

|                                                                                                                           |     |
|---------------------------------------------------------------------------------------------------------------------------|-----|
| 1. Experimental Section.....                                                                                              | S2  |
| 2. HPLC spectra of compounds <b>4a~4i</b> .....                                                                           | S8  |
| 3. The mass spectra of cyclopeptide 3-hydroxy-isoindolone-cyclo-(Gly-Ile-Pro-Pro-Leu) ..                                  | S10 |
| 4. Computational details: .....                                                                                           | S11 |
| 5. The summarized structures for <b>4a~4i</b> .....                                                                       | S11 |
| 6. Table S1. Experimental and theoretical <sup>1</sup> H and <sup>13</sup> C isotropic chemical shifts of <b>4f</b> ..... | S12 |
| 7. <sup>1</sup> H, <sup>13</sup> C-NMR and HRMS of bis-linear peptides and bis-cyclic peptides.....                       | S13 |

## 1. Experimental Section

### 1.1 General Experimental Procedures.

L-cystine(56-89-3), Boc-L-proline(15761-39-4), Boc-L-leucine(13139-15-6), Boc-Sar-OH(13734-36-6), Boc-L-Alanine(15761-38-3), L-isoleucine(73-32-5), *t*-Boc, EEDQ, *N*-[(trimethylsilyl)methyl]benzylamine, phthalylglycyl chloride, trifluoroacetic acid (TFA) and tetrahydrofuran (THF) were purchased from Saen Chemistry Technology (Shanghai) Co., Ltd. Dichloromethane (DCM), trimethylamine (TEA), methanol, ethyl acetate, petroleum ether, 1,4-dioxane were analytical reagent. All the solvents were distilled and purified by standard procedures. <sup>1</sup>H and <sup>13</sup>C-NMR spectra were recorded at 400 and 100 MHz, respectively, on an AMX400 spectrometer (Bruker, Bremen, Germany). Mass spectra were recorded on a JEOL JMS-700 spectrometer using the fast atom bombardment (FAB) or electron impact (EI) mode. A 450 W Hanovia medium-pressure mercury lamp surrounded by a Pyrex glass filter ( $\lambda > 290$  nm) was used for electronic excitation

### 1.2 Synthesis of linear peptidyl-SiMe<sub>3</sub> (1)

The linear peptides were prepared by liquid phase method using *t*-Boc-amino acid as the starting material, EEDQ as condensing agent and TFA as deprotecting agent. Here, take the *L*-Ile-*L*-Leu-SiMe<sub>3</sub> for an example to elucidate the synthesis process. The Boc-*L*-leucine (2.31 g, 10 mmol) and *N*-[(trimethylsilyl) methyl]benzylamine (1.93 g, 10 mmol) were dissolved in 30 mL of DCM, then EEDQ(3.78 g, 15 mmol in 10 mL of DCM) was added dropwise with stirring at room temperature for 12 h. After which the reaction solution was washed thrice with 30 mL of water, and dried with anhydrous sodium sulfate. The concentrated residue was dissolved in 20 mL of DCM, followed with addition of 10 mL of TFA and stirring at room temperature for 3 h. Then the reaction solution was concentrated to remove the solvent and TFA. The residue was again dissolved in 20 mL of DCM, washed thrice with 30 mL of water, and concentrated to obtain the crude *N*-trimethylsilylbenzyl-Leu, which was used for further synthesis without any purification. The crude *N*-trimethylsilylbenzyl-Leu and *t*-Boc-*L*-Ile (1.53 g) were dissolved in 30 mL of DCM, and EEDQ (2.65 g in 10 mL of DCM) was added dropwise with stirring at room temperature for 12 h. Then the reaction solution was washed thrice with 30 mL of water, added with 10 mL of TFA and stirred at room temperature for 3 h. The reaction solution was concentrated and re-dissolved in 20 mL of DCM, then dried with anhydrous sodium sulfate and re-concentrated to obtain the crude trimethylsilyl terminal-*L*-Ile-*L*-Leu. The rest trimethylsilyl terminal peptide chains (such as Pro-Ile-Leu-SiMe<sub>3</sub>, Cys-Sar-SiMe<sub>3</sub>, Cys-Sar-Sar-SiMe<sub>3</sub>, Sar-Sar-Sar-SiMe<sub>3</sub>, Sar-Sar-Sar-Sar-SiMe<sub>3</sub>, Sar-Sar-Sar-Sar-Sar-SiMe<sub>3</sub>, Sar-Sar-Sar-Sar-Sar-SiMe<sub>3</sub>)

Sar-SiMe<sub>3</sub>, Ala-Sar-SiMe<sub>3</sub>, Ala-Sar-Sar-SiMe<sub>3</sub>, Ala-Ala-Sar-Ala-Sar-SiMe<sub>3</sub>) were prepared in a similar way, and used for further reaction without purification.

### 1.3 Synthesis of sulfido-[peptidyl-SiMe<sub>3</sub>]<sub>2</sub> (**2**)

General synthetic process: compounds **1** (6 mmol) and Boc-Cys-Cys (1.32 g, 3 mmol) was dissolved in 30 mL of THF, EEDQ (2.27 g, 9 mmol in 10 mL of DCM) was then added dropwise with stirring at room temperature for 12 h. The reaction solution was washed twice with 20 mL of water, the organic layer was dried over anhydrous sodium sulfate and concentrated. The residue was dissolved in 20 mL of DCM, added with 10 mL of TFA and stirred for 3h. The mixture was concentrated to obtain crude products sulfido-[peptidyl-SiMe<sub>3</sub>]<sub>2</sub> (compounds **2**), which were used for further reaction without purification.

### 1.4 Synthesis of sulfido-[N-phthalimido-peptidyl-SiMe<sub>3</sub>]<sub>2</sub> (**3a~3i**)

General synthetic process: compounds **2** (1 mmol) and TEA (3 mL) were dissolved in DCM, then phthalimide acetyl chloride (0.41 g, 2 mmol in 3 mL of 1,4-dioxane) was added dropwise. After stirring at room temperature for 3 h, the reaction solution washed twice with 20 mL of water. The organic layer was dried over anhydrous sodium sulphate, then concentrated and purified by silica gel column chromatography (mobile phase  $V_{EA}/V_{PE} = 2:1$ ) to obtain white solid compound sulfido-[N-phthalimido-peptide-SiMe<sub>3</sub>]<sub>2</sub> (**1**).

Sulfido-[N-phthalimido-Gly-*L*-Cys-Sar-SiMe<sub>3</sub>]<sub>2</sub> (**3a**): white solid (yield 85%). <sup>1</sup>HNMR(CDCl<sub>3</sub>)  $\delta$ : 0.07~0.18(m, 18H, SiMe<sub>3</sub>), 2.56~2.90(m, 4H, CH<sub>2</sub>SiMe<sub>3</sub>), 3.02~3.25(m, 6H, NCH<sub>3</sub>), 3.27~3.42(m, 4H, SCH<sub>2</sub>CH), 4.01~4.38(m, 4H, NCH<sub>2</sub>CO), 4.40~4.47(m, 4H, CH<sub>2</sub>Ph), 4.49~4.56(m, 4H, NCH<sub>2</sub>CO), 4.83~4.96(m, 1H, HNCHCO), 5.29~5.40(m, 1H, NHCHCO), 7.19~7.85(m, 18H, ArH); <sup>13</sup>CNMR(CDCl<sub>3</sub>)  $\delta$  : -1.5, 34.6, 35.6, 36.6, 39.1, 40.2, 49.7, 52.5, 123.4, 126.6, 127.6, 129.4, 132.5, 134.3, 136.1, 166.3, 167.3, 167.7, 169.8, 170.5. HRMS (ESI) m/z calcd for C<sub>54</sub>H<sub>66</sub>N<sub>8</sub>O<sub>10</sub>S<sub>2</sub>Si<sub>2</sub>Na<sup>+</sup> (M+Na)<sup>+</sup> 1129.37741, found 1129.37805.

Sulfido-[N-phthalimido-Gly-*L*-Cys-Sar-Sar-SiMe<sub>3</sub>]<sub>2</sub> (**3b**): white solid (yield 87%). <sup>1</sup>HNMR(CDCl<sub>3</sub>)  $\delta$ : 0.03~0.15(m, 18H, SiMe<sub>3</sub>), 2.75~2.82(m, 10H, CH<sub>2</sub>SiMe<sub>3</sub> and NCH<sub>3</sub>), 2.95~3.35(m, 10H, NCH<sub>3</sub> and SCH<sub>2</sub>CH), 3.81~4.80(m, 18H, NCH<sub>2</sub>CO, CH<sub>2</sub>Ph and NCH<sub>2</sub>CO), 4.85~5.15(m, 1H, HNCHCO), 5.19~5.40(m, 1H, NHCHCO), 7.17~7.79(m, 18H, ArH); <sup>13</sup>CNMR(CDCl<sub>3</sub>)  $\delta$  : -1.3, 35.8, 36.6, 39.0, 40.1, 41.5, 49.3, 50.2, 51.2, 52.6, 123.3, 126.1, 126.6, 127.3, 127.6, 129.0, 132.1, 133.9, 136.2, 166.2, 167.0, 167.5, 168.5, 170.2, 170.4. HRMS (ESI) m/z calcd for C<sub>60</sub>H<sub>76</sub>N<sub>10</sub>O<sub>12</sub>S<sub>2</sub>Si<sub>2</sub>Na<sup>+</sup> (M+Na)<sup>+</sup> 1271.45163, found 1271.45264.

Sulfido-[N-phthalimido-Gly-*L*-Cys-*L*-Ala-Sar-SiMe<sub>3</sub>]<sub>2</sub> (**3c**): white solid (yield 85%). <sup>1</sup>HNMR(CDCl<sub>3</sub>)  $\delta$ : 0.06~0.21(m, 18H, SiMe<sub>3</sub>), 1.22~1.38(m, 6H, CHCH<sub>3</sub>), 2.60~2.92(m, 4H,

$\text{CH}_2\text{SiMe}_3$ ), 2.98~3.40(m, 10H,  $\text{NCH}_3$ ), 3.60~4.35(m, 6H,  $\text{SCH}_2\text{CH}$  and  $\text{NCH}_2\text{CO}$ ,  $\text{NCH}_2\text{CO}$ ), 4.36~4.65(m, 6H,  $\text{CH}_2\text{Ph}$  and  $\text{NCH}_2\text{CO}$ ), 4.67~4.85(m, 2H,  $\text{HNCHCO}$ ), 4.86~5.28(m, 2H,  $\text{NHCHCO}$ ), 7.21~7.84(m, 18H, ArH);  $^{13}\text{CNMR}(\text{CDCl}_3)$   $\delta$ : -1.6, 19.1, 20.8, 27.5, 36.0, 39.8, 42.7, 45.4, 50.1, 59.8, 123.4, 126.6, 127.6, 128.7, 132.2, 133.3, 136.4, 165.3, 166.0, 167.7, 168.7, 171.2, 173.0. HRMS (ESI)  $m/z$  calcd for  $\text{C}_{60}\text{H}_{76}\text{N}_{10}\text{O}_{12}\text{S}_2\text{Si}_2\text{Na}^+$  ( $\text{M}+\text{Na}$ ) $^+$  1271.45163, found 1271.45300.

Sulfido-[N-phthalimido-Gly-*L*-Cys-Sar-Sar-Sar-SiMe<sub>3</sub>]<sub>2</sub> (**3d**): white solid (yield 88%).  $^1\text{HNMR}(\text{CDCl}_3)$   $\delta$ : 0.03~0.18(m, 18H, SiMe<sub>3</sub>), 2.72~3.32(m, 26H,  $\text{CH}_2\text{SiMe}_3$ ,  $\text{NCH}_3$  and  $\text{SCH}_2\text{CH}$ ), 3.91~4.28(m, 8H,  $\text{CH}_2\text{Ph}$  and  $\text{NCH}_2\text{CO}$ ), 4.30~4.35(m, 4H,  $\text{NCH}_2\text{CO}$ ), 4.38~4.72(m, 8H,  $\text{NCH}_2\text{CO}$ ), 4.90~5.30(m, 1H,  $\text{HNCHCO}$ ), 5.32~5.60(m, 1H,  $\text{NHCHCO}$ ), 7.13~7.76(m, 18H, ArH);  $^{13}\text{CNMR}(\text{CDCl}_3)$   $\delta$ : -1.2, 30.9, 35.8, 36.6, 37.4, 39.0, 40.1, 49.7, 50.4, 51.3, 52.8, 53.6, 123.4, 126.4, 127.4, 127.6, 128.5, 128.8, 132.1, 133.9, 136.1, 136.6, 166.4, 167.7, 168.2, 168.7, 170.4, 171.1. HRMS (ESI)  $m/z$  calcd for  $\text{C}_{66}\text{H}_{86}\text{N}_{12}\text{O}_{14}\text{S}_2\text{Si}_2\text{Na}^+$  ( $\text{M}+\text{Na}$ ) $^+$  1413.52586, found 1413.52710.

Sulfido-[N-phthalimido-Gly-*L*-Cys-*L*-Ala-Sar-Sar-SiMe<sub>3</sub>]<sub>2</sub> (**3e**): white solid (yield 88%).  $^1\text{HNMR}(\text{CDCl}_3)$   $\delta$ : 0.01~0.24(m, 18H, SiMe<sub>3</sub>), 1.32~1.56(m, 6H,  $\text{CHCH}_3$ ), 2.65~2.82(m, 4H,  $\text{CH}_2\text{SiMe}_3$ ), 2.83~2.95(m, 4H,  $\text{SCH}_2\text{CH}$ ), 3.00~3.45(m, 6H,  $\text{NCH}_3$ ), 3.60~3.81(m, 2H,  $\text{NCH}_2\text{CO}$ ), 3.82~4.05(m, 2H,  $\text{NCH}_2\text{CO}$ ), 4.06~4.31(m, 4H,  $\text{CH}_2\text{Ph}$ ), 4.32~4.65(m, 6H,  $\text{NCH}_2\text{CO}$ ), 4.70~4.80(m, 2H,  $\text{HNCHCO}$ ), 4.82~5.00(m, 2H,  $\text{NHCHCO}$ ), 5.01~5.25(m, 2H,  $\text{NHCHCO}$ ), 7.14~7.84(m, 18H, ArH);  $^{13}\text{CNMR}(\text{CDCl}_3)$   $\delta$ : -1.6, 13.4, 19.1, 21.2, 26.9, 35.3, 36.6, 39.8, 45.8, 49.6, 51.4, 61.2, 123.4, 126.3, 128.7, 131.9, 133.7, 136.4, 164.9, 166.7, 167.0, 167.7, 168.0, 171.2, 174.0. HRMS (ESI)  $m/z$  calcd for  $\text{C}_{66}\text{H}_{86}\text{N}_{12}\text{O}_{14}\text{S}_2\text{Si}_2\text{Na}^+$  ( $\text{M}+\text{Na}$ ) $^+$  1413.52586, found 1413.52722.

Sulfido-[N-phthalimido-Gly-*L*-Cys-*L*-Pro-*L*-Ile-*L*-Leu-SiMe<sub>3</sub>]<sub>2</sub> (**3f**): white solid (yield 78%).  $^1\text{HNMR}(\text{CDCl}_3, 500 \text{ MHz})$   $\delta$ : -0.28~0.30(m, 18H, SiMe<sub>3</sub>), 0.55~0.96(m, 24H,  $\text{CH}_3$ ), 1.01~1.21(m, 2H,  $\text{CH}(\text{CH}_3)_2$ ), 1.23~1.41(m, 4H,  $\text{CH}_2\text{CH}_3$ ), 1.43~1.75(m, 4H,  $\text{CHCH}_2\text{CH}$ ), 1.78~2.28(m, 10H,  $\text{NCH}_2\text{CH}_2\text{CH}_2\text{CH}$ )<sub>2</sub>,  $\text{NCH}_2\text{CH}_2\text{CH}_2\text{CH}$  and  $\text{CHCH}_3$ ), 2.78~2.95(m, 4H,  $\text{CH}_2\text{SiMe}_3$ ), 2.98~3.28(m, 4H,  $\text{SCH}_2\text{CH}$ ), 3.55~3.85(m, 4H,  $\text{NCH}_2\text{CH}_2\text{CH}_2\text{CH}$ ), 4.20~4.30(m, 2H,  $\text{NCH}_2\text{CH}_2\text{CH}_2\text{CH}$ ), 4.33~4.48(m, 4H,  $\text{NCH}_2\text{CO}$ ), 4.49~4.78(m, 4H,  $\text{CH}_2\text{Ph}$ ), 4.85~5.00(m, 2H,  $\text{HNCHCO}$ ), 5.01~5.27(m, 2H,  $\text{HNCHCO}$ ), 5.30~5.40(m, 2H,  $\text{HNCHCO}$ ), 7.13~7.45(m, 10H, ArH), 7.54~7.80(m, 4H, ArH), 7.81~7.91(m, 4H, ArH);  $^{13}\text{CNMR}(\text{CDCl}_3, 500 \text{ MHz})$   $\delta$ : 0.02, 12.7, 16.9, 22.9, 24.6, 25.8, 38.3, 39.0, 40.1, 41.4, 42.8, 44.2, 48.3, 49.2, 51.4, 51.8, 54.3, 59.2, 61.2, 61.9, 124.8, 128.0, 129.0, 129.9, 130.1, 133.3, 135.3, 167.5, 168.9, 170.1, 170.8, 171.6, 172.1. HRMS (ESI)  $m/z$  calcd for

$C_{82}H_{115}N_{12}O_{14}S_2Si_2^+ (M+H)^+$  1611.76302, found 1611.76355.

Sulfido-[N-phthalimido-Gly-*L*-Cys-Sar-Sar-Sar-Sar-SiMe<sub>3</sub>]<sub>2</sub>(**3g**): white solid (yield 89%).  
<sup>1</sup>HNMR(CDCl<sub>3</sub>)  $\delta$ : 0.08~0.15(m, 18H, SiMe<sub>3</sub>), 2.59~2.98(m, 8H, CH<sub>2</sub>SiMe<sub>3</sub> and SCH<sub>2</sub>CH), 3.00~3.21(m, 12H, NCH<sub>3</sub>), 3.22~3.49(m, 12H, NCH<sub>3</sub>), 4.01~4.31(m, 16H, NCH<sub>2</sub>CO), 4.32~4.45(m, 4H, CH<sub>2</sub>Ph), 4.48~4.72(m, 4H, NCH<sub>2</sub>CO), 4.93~5.16(m, 1H, HNCHCO), 5.28~5.36(m, 1H, NHCHCO), 7.19~7.83(m, 18H, ArH); <sup>13</sup>CNMR(CDCl<sub>3</sub>)  $\delta$ : -1.5, 14.6, 21.2, 30.0, 36.3, 37.4, 39.5, 40.2, 46.5, 49.6, 50.4, 52.8, 56.0, 60.9, 123.5, 126.3, 127.0, 128.0, 128.7, 132.2, 133.3, 135.4, 160.0, 163.8, 164.5, 166.0, 167.0, 167.7, 168.0, 170.5. HRMS (ESI) m/z calcd for C<sub>72</sub>H<sub>96</sub>N<sub>14</sub>O<sub>16</sub>S<sub>2</sub>Si<sub>2</sub>Na<sup>+</sup> (M+Na)<sup>+</sup> 1555.60009, found 1555.60144.

Sulfido-[N-phthalimido-Gly-*L*-Cys-Sar-Sar-Sar-Sar-Sar-SiMe<sub>3</sub>]<sub>2</sub> (**3h**): white solid (yield 82%).  
<sup>1</sup>HNMR(CDCl<sub>3</sub>)  $\delta$ : 0.01~0.08(m, 18H, SiMe<sub>3</sub>), 2.50~2.79(m, 4H, CH<sub>2</sub>SiMe<sub>3</sub>), 2.80~2.90(m, 2H, SCH<sub>2</sub>CH), 2.92~3.25(m, 20H, NCH<sub>2</sub>CO), 3.26~3.35(m, 30H, NCH<sub>3</sub>), 3.85~4.05(m, 4H, CH<sub>2</sub>Ph), 4.10~4.32(m, 4H, NCH<sub>2</sub>CO), 4.83~5.06(m, 1H, HNCHCO), 5.10~5.32(m, 1H, NHCHCO), 7.11~7.75(m, 18H, ArH); <sup>13</sup>CNMR(CDCl<sub>3</sub>)  $\delta$ : -1.37, 19.6, 22.6, 26.8, 27.7, 29.7, 31.6, 35.8, 36.8, 39.0, 40.1, 49.4, 49.7, 50.3, 52.5, 61.5, 115.3, 118.2, 123.3, 126.3, 127.7, 128.5, 128.8, 131.7, 134.1, 135.7, 166.6, 166.7, 166.9, 167.1, 167.7, 167.8, 168.4, 169.1, 169.8. HRMS (ESI) m/z calcd for C<sub>78</sub>H<sub>106</sub>N<sub>16</sub>O<sub>18</sub>S<sub>2</sub>Si<sub>2</sub>Na<sup>+</sup> (M+Na)<sup>+</sup> 1697.67432, found 1697.67419.

Sulfido-[N-phthalimido-Gly-*L*-Cys-*L*-Ala-*L*-Ala-Sar-*L*-Ala-Sar-SiMe<sub>3</sub>]<sub>2</sub> (**3i**): white solid (yield 87%). <sup>1</sup>HNMR(CDCl<sub>3</sub>)  $\delta$ : 0.05~0.16(m, 18H, SiMe<sub>3</sub>), 1.24~1.39(m, 18H, CHCH<sub>3</sub>), 2.72~3.08(m, 8H, CH<sub>2</sub>SiMe<sub>3</sub> and SCH<sub>2</sub>CH), 3.11~3.30(m, 12H, NCH<sub>3</sub>), 3.78~4.22(m, 4H, NCH<sub>2</sub>CO), 4.26~4.45(m, 2H, NCH<sub>2</sub>CO), 4.46~4.55(m, 4H, CH<sub>2</sub>Ph), 4.67~4.82(m, 4H, HNCHCO), 4.90~5.18(m, 4H, NHCHCO), 7.14~7.77(m, 18H, ArH); <sup>13</sup>CNMR(CDCl<sub>3</sub>)  $\delta$ : -1.5, 18.1, 18.8, 22.6, 27.2, 36.6, 38.8, 39.8, 45.1, 45.5, 48.6, 50.0, 51.4, 52.5, 60.6, 66.6, 117.1, 119.6, 126.3, 127.0, 128.0, 128.7, 132.2, 133.7, 135.0, 164.9, 166.3, 167.3, 168.4, 168.7, 169.8, 171.2, 173.0, 173.4. HRMS (ESI) m/z calcd for C<sub>78</sub>H<sub>106</sub>N<sub>16</sub>O<sub>18</sub>S<sub>2</sub>Si<sub>2</sub>Na<sup>+</sup> (M+Na)<sup>+</sup> 1697.67432, found 1697.67419.

### 1.5 Synthesis of sulfido-[isoindolone cyclopeptide]<sub>2</sub> (**4a-4i**)

0.5 g of compounds **3** in 250 mL of anhydrous methanol were placed in a reactor, then ventilated nitrogen gas flow for 20 min. Upon maintaining the ventilation of nitrogen, the solutions were irradiated by ultraviolet light (Pyrex tube filtered-light  $\lambda > 290$  nm). Concentration of the photoproducts were followed by column chromatography to yield the pure products (**4a-4i**).

Sulfido-[isoindolone-cyclo-Gly-*L*-Cys-Sar]<sub>2</sub>(**4a**): white solid, yield 75% (HPLC yield 83%),

mobile phases  $V_{\text{H}_2\text{O}}/V_{\text{MeCN}} = 60:40$ , the retention time 5.8 min,  $[\alpha]_{\text{D}}^{20} = +22.4^\circ$  ( $c = 0.04$  g/100 ml,  $\text{CH}_2\text{Cl}_2$ );  $^1\text{HNMR}(\text{CDCl}_3)$   $\delta$ : 2.51~2.93(m, 4H,  $\text{SCH}_2\text{CH}$ ), 2.95~3.30(m, 6H,  $\text{NCH}_3$ ), 3.32~3.72(m, 4H,  $\text{NCH}_2\text{CO}$ ), 4.01~4.52(m, 6H,  $\text{CH}_2\text{Ph}$  and  $\text{NCH}_2\text{CO}$ ), 4.58~4.87(m, 6H,  $\text{NCH}_2\text{CO}$ ), 4.93~5.45(m, 2H,  $\text{HNCHCO}$ ), 7.14~7.50(m, 12H, ArH), 7.68~7.79(m, 6H, ArH);  $^{13}\text{CNMR}(\text{CDCl}_3)$   $\delta$  : 28.9, 31.5, 36.0, 39.8, 43.5, 49.2, 52.5, 89.5, 121.9, 123.8, 126.0, 127.5, 127.8, 128.6, 132.0, 134.3, 166.3, 167.7, 169.3, 171.1. HRMS (ESI)  $m/z$  calcd for  $\text{C}_{48}\text{H}_{50}\text{N}_8\text{O}_{10}\text{S}_2\text{Na}^+$  ( $\text{M}+\text{Na}$ ) $^+$  985.29835, found 985.29852.

Sulfido-[isoindolone-cyclo-Gly-*L*-Cys-Sar-Sar] $_2$  (**4b**): white solid, yield 80% (HPLC yield 89%), mobile phases  $V_{\text{H}_2\text{O}}/V_{\text{MeCN}} = 60:40$ , the retention time 5.2 min,  $[\alpha]_{\text{D}}^{20} = -16.67^\circ$  ( $c = 0.06$  g/100 ml,  $\text{CH}_2\text{Cl}_2$ );  $^1\text{HNMR}(\text{CDCl}_3)$   $\delta$ : 2.55~3.42(m, 20H,  $\text{NCH}_3$ ,  $\text{SCH}_2\text{CH}$  and  $\text{NCH}_2\text{CO}$ ), 3.52~4.65(m, 16H,  $\text{CH}_2\text{Ph}$  and  $\text{NCH}_2\text{CO}$ ), 4.75~4.92(m, 1H,  $\text{HNCHCO}$ ), 4.95~5.33(m, 1H,  $\text{NHCHCO}$ ), 7.16~7.30(m, 10H, ArH) , 7.62~7.79(m, 8H, ArH);  $^{13}\text{CNMR}(\text{CDCl}_3)$   $\delta$  : 29.6, 31.5, 36.3, 36.9, 39.1, 39.9, 49.5, 50.3, 52.4, 99.5, 123.1, 125.9, 127.0, 128.7, 131.9, 134.0, 135.4, 167.0, 167.7, 168.7, 170.5, 171.2. HRMS (ESI)  $m/z$  calcd for  $\text{C}_{54}\text{H}_{60}\text{N}_{10}\text{O}_{12}\text{S}_2\text{Na}^+$  ( $\text{M}+\text{Na}$ ) $^+$  1127.37258, found 1127.37988.

Sulfido-[isoindolone-cyclo-Gly-*L*-Cys-*L*-Ala-Sar] $_2$  (**4c**): white solid, yield 51% (HPLC yield 60%), mobile phases  $V_{\text{H}_2\text{O}}/V_{\text{MeCN}} = 40:60$ , the retention time 5.6 min,  $[\alpha]_{\text{D}}^{20} = -20.07^\circ$  ( $c = 0.04$  g/100 ml,  $\text{CH}_2\text{Cl}_2$ );  $^1\text{HNMR}(\text{CDCl}_3)$   $\delta$ : 0.89~1.18(m, 6H,  $\text{CHCH}_3$ ), 2.85~3.02(m, 4H,  $\text{SCH}_2\text{CH}$ ), 3.18~3.30(m, 6H,  $\text{NCH}_3$ ), 3.50~4.05(m, 6H,  $\text{NCH}_2\text{CO}$ ), 4.16~4.45(m, 4H,  $\text{CH}_2\text{Ph}$ ), 4.36~4.72(m, 6H,  $\text{NCH}_2\text{C}(\text{OH})$  and  $\text{NCH}_2\text{CO}$ ), 4.70~4.85(m, 2H,  $\text{HNCHCO}$ ), 4.86~5.18(m, 2H,  $\text{NHCHCO}$ ), 7.16~7.31(m, 10H, ArH) , 7.50~7.52(m, 2H, ArH) , 7.66~7.78(m, 6H, ArH);  $^{13}\text{CNMR}(\text{CDCl}_3)$   $\delta$  : 13.4, 23.0, 27.2, 29.2, 36.6, 46.2, 51.8, 60.2, 65.1, 99.5, 123.4, 126.3, 127.3, 128.3, 130.5, 131.9, 135.7, 139.9, 161.4, 164.2, 164.5, 168.0, 170.5. HRMS (ESI)  $m/z$  calcd for  $\text{C}_{54}\text{H}_{60}\text{N}_{10}\text{O}_{12}\text{S}_2\text{Na}^+$  ( $\text{M}+\text{Na}$ ) $^+$  1127.37258, found 1127.37842.

Sulfido-[isoindolone-cyclo-Gly-*L*-Cys-*L*-Sar-Sar-Sar] $_2$  (**4d**): white solid, yield 76% (HPLC yield 88%), mobile phases  $V_{\text{H}_2\text{O}}/V_{\text{MeCN}} = 60:40$ , the retention time 3.2 min,  $[\alpha]_{\text{D}}^{20} = +31.25^\circ$  ( $c = 0.06$  g/100 ml,  $\text{CH}_2\text{Cl}_2$ );  $^1\text{HNMR}(\text{CDCl}_3)$   $\delta$ : 2.22~3.62(m, 34H,  $\text{NCH}_3$ ,  $\text{SCH}_2\text{CH}$  and  $\text{NCH}_2\text{CO}$ ), 3.71~4.58(m, 12H,  $\text{CH}_2\text{Ph}$  and  $\text{NCH}_2\text{CO}$ ), 4.60~4.71(m, 1H,  $\text{HNCHCO}$ ), 5.01~5.25(m, 1H,  $\text{NHCHCO}$ ), 7.15~7.78(m, 18H, ArH);  $^{13}\text{CNMR}(\text{CDCl}_3)$   $\delta$  : 27.5, 29.6, 31.2, 35.7, 36.4, 38.9, 40.2, 49.5, 49.7, 52.6, 53.5, 99.9, 123.4, 126.3, 127.8, 128.6, 128.8, 132.0, 134.1, 136.2, 166.4, 166.9, 167.7, 168.9, 169.6, 171.1. HRMS (ESI)  $m/z$  calcd for  $\text{C}_{60}\text{H}_{70}\text{N}_{12}\text{O}_{14}\text{S}_2\text{Na}^+$  ( $\text{M}+\text{Na}$ ) $^+$  1269.44681, found 1269.44678.

Sulfido-[isoindolone-cyclo-Gly-*L*-Cys-*L*-Ala-Sar-Sar] $_2$ (**4e**): white solid, yield 60% (HPLC

yield 71%), mobile phases  $V_{H_2O}/V_{MeCN} = 45:55$ , the retention time 4.4 min,  $[\alpha]_D^{20} = +33.14^\circ$  ( $c = 0.05$  g/100 ml,  $CH_2Cl_2$ );  $^1H$ NMR( $CDCl_3$ )  $\delta$ : 0.89~1.18(m, 6H,  $CHCH_3$ ), 2.65~2.72(m, 4H,  $SCH_2CH$ ), 2.95~3.45(m, 12H,  $NCH_3$ ), 3.59~3.81(m, 2H,  $NCH_2CO$ ), 3.82~4.15(m, 2H,  $NCH_2CO$ ), 4.16~4.35(m, 6H,  $CH_2Ph$  and  $NCH_2CO$ ), 4.36~4.75(m, 8H,  $NCH_2C(OH)$  and  $NCH_2CO$ ), 4.78~4.89(m, 2H,  $HNCHCO$ ), 4.90~5.28(m, 4H,  $NHCHCO$ ), 7.18~7.86(m, 18H, ArH);  $^{13}C$ NMR( $CDCl_3$ )  $\delta$ : 18.8, 20.5, 27.5, 36.6, 39.8, 43.0, 45.8, 49.6, 51.4, 52.1, 60.2, 99.5, 120.6, 123.1, 125.9, 128.3, 132.2, 133.7, 136.1, 139.9, 164.9, 166.0, 167.3, 169.1, 171.2, 173.7. HRMS (ESI)  $m/z$  calcd for  $C_{60}H_{70}N_{12}O_{14}S_2Na^+$  ( $M+Na$ ) $^+$  1269.44681, found 1269.44617.

Sulfido-[isoindolone-cyclo-Gly-*L*-Cys-*L*-Pro-*L*-Ile-*L*-Leu] $_2$ (**4f**): white solid (yield 40%).  $^1H$ NMR( $CDCl_3$ , 500 MHz)  $\delta$ : 0.51~0.99(m, 24H,  $CH_3$ ), 1.15~1.30(m, 4H,  $CH_2CH_3$ ), 1.38~1.76(m, 6H,  $CH(CH_3)_2$  and  $CHCH_2CH$ ), 1.80~2.32(m, 10H,  $NCH_2CH_2CH_2CH$ ,  $NCH_2CH_2CH_2CH$  and  $CHCH_3$ ), 2.58~2.95(m, 4H,  $SCH_2CH$ ), 2.98~3.45(m, 4H,  $NCH_2CH_2CH_2CH$ ), 3.48~3.85(m, 4H,  $NCH_2CO$ ), 4.18~4.28(m, 2H,  $NCH_2CH_2CH_2CH$ ), 4.32~4.79(m, 8H,  $CH_2Ph$  and  $NCH_2C(OH)$ ), 4.85~5.20(m, 4H,  $HNCHCO$  and  $NHCHCO$ ), 5.21~5.38(m, 2H,  $HNCHCO$ ), 6.80~7.33(m, 10H, ArH), 7.34~7.80(m, 8H, ArH);  $^{13}C$ NMR( $CDCl_3$ , 500 MHz)  $\delta$ : 14.1, 15.6, 22.7, 23.3, 24.9, 29.7, 31.9, 34.4, 37.2, 38.0, 41.3, 43.8, 49.0, 49.6, 51.3, 56.7, 57.7, 62.6, 97.0, 120.6, 123.5, 127.8, 128.9, 132.6, 134.1, 136.3, 138.3, 146.9, 159.6, 160.0, 161.6, 164.5, 167.7, 168.2. HRMS (ESI)  $m/z$  calcd for  $C_{76}H_{99}N_{12}O_{14}S_2^+$  ( $M+H$ ) $^+$  1467.68396, found 1467.68469.

Sulfido-[isoindolone-cyclo-Gly-*L*-Cys-*L*-Sar-Sar-Sar-Sar] $_2$ (**4g**): white solid, yield 78% (HPLC yield 87%), mobile phases  $V_{H_2O}/V_{MeCN} = 60:40$ , the retention time 5.8 min,  $[\alpha]_D^{20} = -21.50^\circ$  ( $c = 0.03$  g/100 ml,  $CH_2Cl_2$ );  $^1H$ NMR( $CDCl_3$ )  $\delta$ : 2.80~3.19(m, 28H,  $SCH_2$  and  $NCH_3$ ), 4.22~4.40(m, 16H,  $NCH_2CO$ ), 4.48~4.81(m, 12H,  $CH_2Ph$  and  $NCH_2CO$ ), 4.90~5.06(m, 1H,  $HNCHCO$ ), 5.08~5.46(m, 1H,  $NHCHCO$ ), 7.18~7.83(m, 18H, ArH);  $^{13}C$ NMR( $CDCl_3$ )  $\delta$ : 22.6, 24.4, 26.4, 27.0, 27.5, 28.0, 29.3, 29.9, 31.9, 32.6, 34.2, 36.0, 37.0, 39.1, 40.3, 49.3, 52.5, 99.9, 123.4, 125.6, 127.0, 128.7, 132.5, 134.0, 163.1, 165.2, 166.3, 167.0, 167.7, 168.2, 168.3, 169.0. HRMS (ESI)  $m/z$  calcd for  $C_{66}H_{80}N_{14}O_{16}S_2Na^+$  ( $M+Na$ ) $^+$  1411.52104, found 1411.52258.

Sulfido-[isoindolone-cyclo-Gly-*L*-Cys-Sar-Sar-Sar-Sar] $_2$  (**4h**): white solid, yield 74% (HPLC yield 85%), mobile phases  $V_{H_2O}/V_{MeCN} = 60:40$ , the retention time 4.5 min,  $[\alpha]_D^{20} = +26.50^\circ$  ( $c = 0.05$  g/100 ml,  $CH_2Cl_2$ );  $^1H$ NMR( $CDCl_3$ )  $\delta$ : 2.82~2.92(m, 10H,  $SCH_2CH$  and  $NCH_2CO$ ), 2.96~3.18(m, 14H,  $NCH_2CO$ ), 3.26~3.39(m, 30H,  $NCH_3$ ), 4.18~4.25(m, 4H,  $CH_2Ph$ ), 4.26~4.39(m, 8H,  $NCH_2C(OH)$  and  $NCH_2CO$ ), 4.45~4.75(m, 2H,  $HNCHCO$ ),

7.18~7.87(m, 18H, ArH);  $^{13}\text{C}$ NMR( $\text{CDCl}_3$ )  $\delta$ : 20.5, 21.2, 22.6, 26.9, 29.2, 36.0, 38.8, 44.7, 49.3, 49.7, 52.8, 56.3, 57.8, 59.5, 66.9, 99.9, 118.5, 123.8, 125.9, 127.3, 128.3, 131.9, 133.7, 136.7, 164.9, 165.6, 166.3, 167.7, 168.7, 170.2, 170.5, 172.6. HRMS (ESI)  $m/z$  calcd for  $\text{C}_{72}\text{H}_{90}\text{N}_{16}\text{O}_{18}\text{S}_2\text{Na}^+$  ( $\text{M}+\text{Na}$ ) $^+$  1553.59526, found 1553.59679.

Sulfido-[isoindolone-cyclo-Gly-*L*-Cys-*L*-Ala-*L*-Ala-Sar-*L*-Ala-Sar] $_2$ (**4i**): white solid, while solid, yield 53% (HPLC yield 62%), mobile phases  $V_{\text{H}_2\text{O}}/V_{\text{MeCN}} = 60:40$ , the retention time 3.9 min,  $[\alpha]_{\text{D}}^{20} = +13.78^\circ$  ( $c = 0.06$  g/100 ml,  $\text{CH}_2\text{Cl}_2$ );  $^1\text{H}$ NMR( $\text{CDCl}_3$ )  $\delta$ : 0.05~0.16(m, 18H, SiMe $_3$ ), 1.28~1.48(m, 18H, CHCH $_3$ ), 2.82~2.98(m, 4H, SCH $_2$ CH and NCH $_2$ CO), 3.18~3.28(m, 12H, NCH $_3$ ), 3.45~3.75(m, 4H, NCH $_2$ CO), 3.80~4.01(m, 4H, NCH $_2$ CO), 4.05~4.35(m, 2H, NCH $_2$ CO), 4.38~4.52(m, 4H, CH $_2$ Ph), 4.53~4.82(m, 6H, NCH $_2$ C(OH) and HNCHCO), 4.85~5.15(m, 4H, NHCHCO), 7.13~7.78(m, 18H, ArH);  $^{13}\text{C}$ NMR( $\text{CDCl}_3$ )  $\delta$ : 8.97, 17.3, 18.4, 34.9, 36.0, 38.5, 39.5, 44.7, 45.8, 48.6, 50.4, 51.4, 52.1, 53.1, 54.6, 99.9, 117.1, 125.2, 126.3, 127.6, 128.0, 134.3, 136.1, 138.2, 163.1, 166.3, 167.0, 168.4, 170.5, 171.2, 172.9, 173.7. HRMS (ESI)  $m/z$  calcd for  $\text{C}_{72}\text{H}_{90}\text{N}_{16}\text{O}_{18}\text{S}_2\text{Na}^+$  ( $\text{M}+\text{Na}$ ) $^+$  1553.59526, found 1553.59460.

## 2. HPLC spectra of compounds 4a~4i.

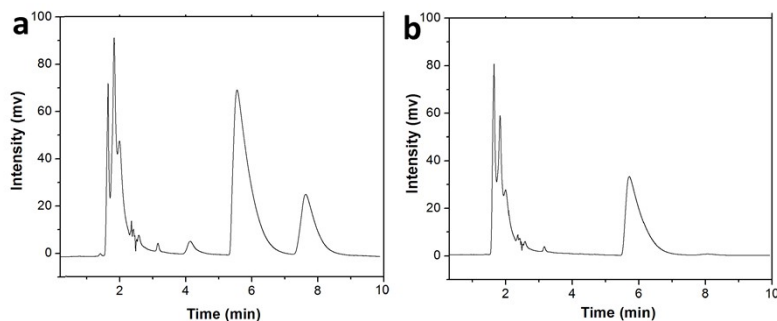

Figure S1. HPLC spectrum of compound **4a**. a) Unpurified mixture. b) Purified.

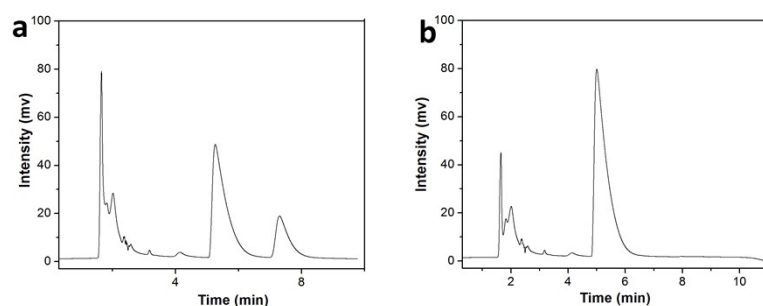

Figure S2. HPLC spectrum of compound **4b**. a) Unpurified mixture. b) Purified.



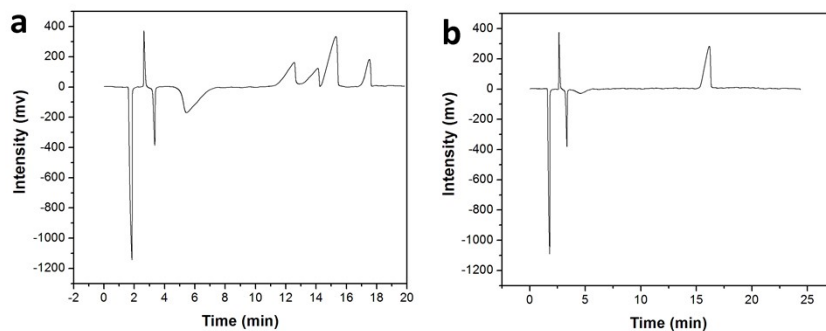

**Figure S3.** HPLC spectrum of compound **4c**. a) Unpurified mixture. b) Purified.

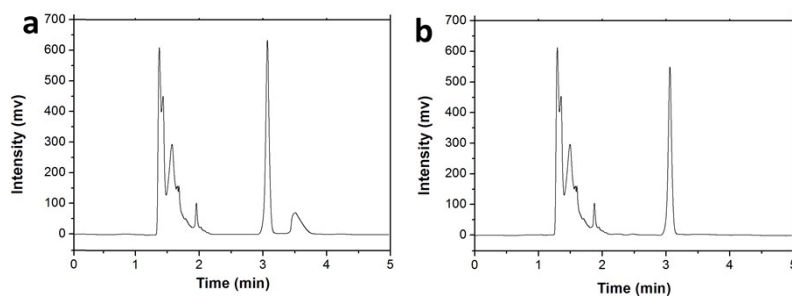

**Figure S4.** HPLC spectrum of compound **4d**. a) Unpurified mixture. b) Purified.

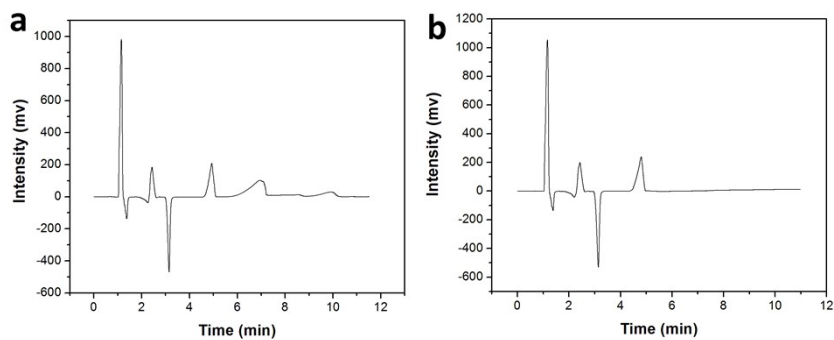

**Figure S5.** HPLC spectrum of compound **4e**. a) Unpurified mixture. b) Purified.

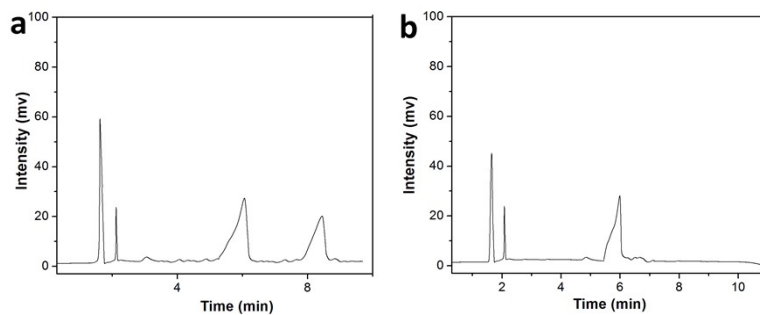

**Figure S6.** HPLC spectrum of compound **4g**. a) Unpurified mixture. b) Purified.

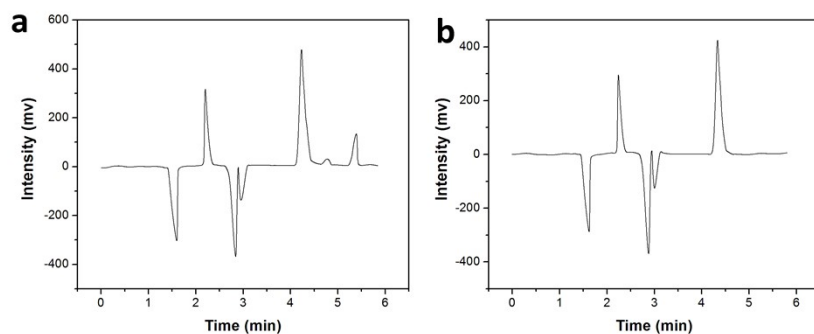

**Figure S7.** HPLC spectrum of compound **4h**. a) Unpurified mixture. b) Purified.

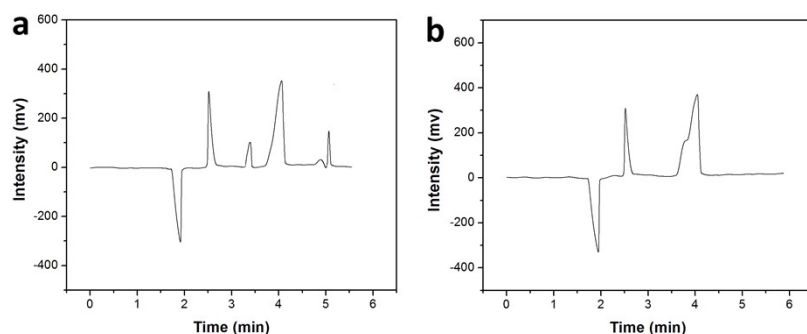

**Figure S8.** HPLC spectrum of compound **4i**. a) Unpurified mixture. b) Purified.

### 3. The mass spectra of cyclopeptide 3-hydroxy-isoindolone-cyclo-(Gly-Ile-Pro-Pro-Leu)

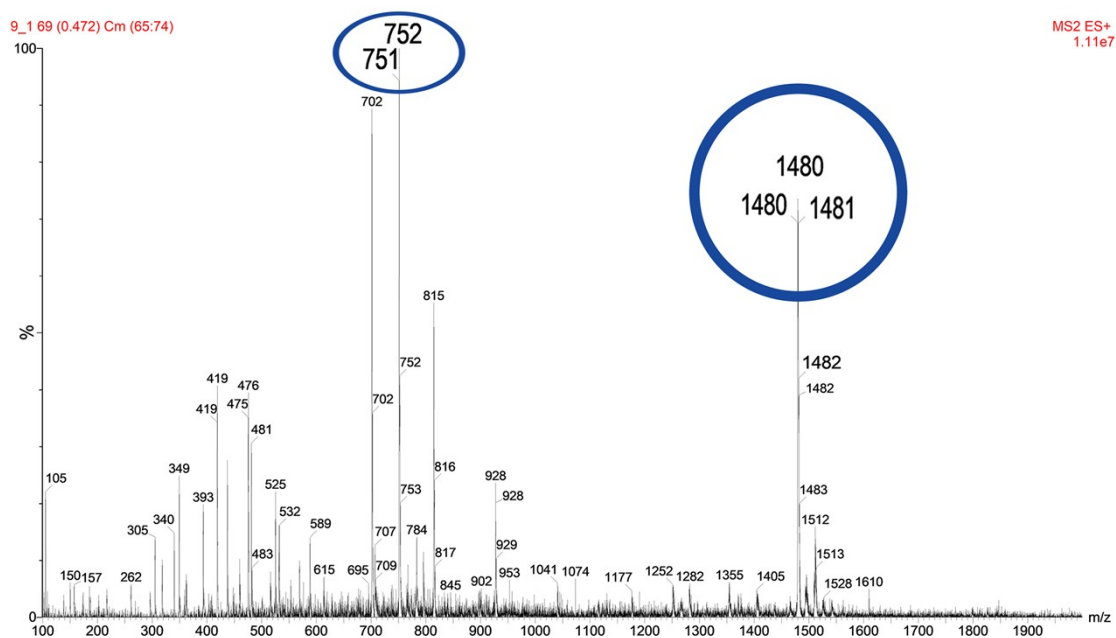

**Figure S9.** The mass spectrum of crude product for a simple single cyclopeptide: the peaks of single cyclopeptide and dimer were circled in blue.

#### 4. Computational details:

There are two possible absolute configurations (ACs) for compound **2f**: C-3R--C-3`R or C-3S--C-3`S isomers. In order to reduce the computational consumption, we simplify the theoretical calculation by breaking the bis-cyclic peptide **2f** at the disulfur bond and simulated the ECD of half fragment of the bicyclic structure. Conformational analysis was performed by fixing the absolute configuration of C-3 for bis-cyclic peptides **2f** with the MMFF94 molecular mechanics force field. The obtained conformers were optimized at the DFT/B3LYP/6-31G(d,p) level by Gaussian 09.<sup>1</sup> Time-dependent DFT calculations were performed on the lowest energy conformations (>5% population) to calculate excitation energy (denoted by wavelength in nm) and rotatory strength R at the level of TDDFT/CAM-B3LYP/6-311++G(d,p) using polarizable continuum model (PCM) to consider the solvent. NMR shifts for the potential structures were simulated by the GIAO method at the level of DFT/B3LYP/6-311++G(d,p) using the optimized structures obtained from the DFT/B3LYP/6-31G(d,p) level. ECD curves were calculated based on rotatory strengths using half bandwidth of 0.30~0.40 eV by Specdis 1.71.<sup>2</sup> The calculated spectra were treated by UV correction to facilitate comparison to the experimental data.

References:

[1] Gaussian 09, Revision C.01; Gaussian, Inc.: Wallingford, CT, 2010.

[2] T. Bruhn, A. Schaumlöffel, Y. Hemberger, G. Bringmann, *Chirality*, 2013, **25**, 243.

#### 5. The summarized structures for 4a~4i.

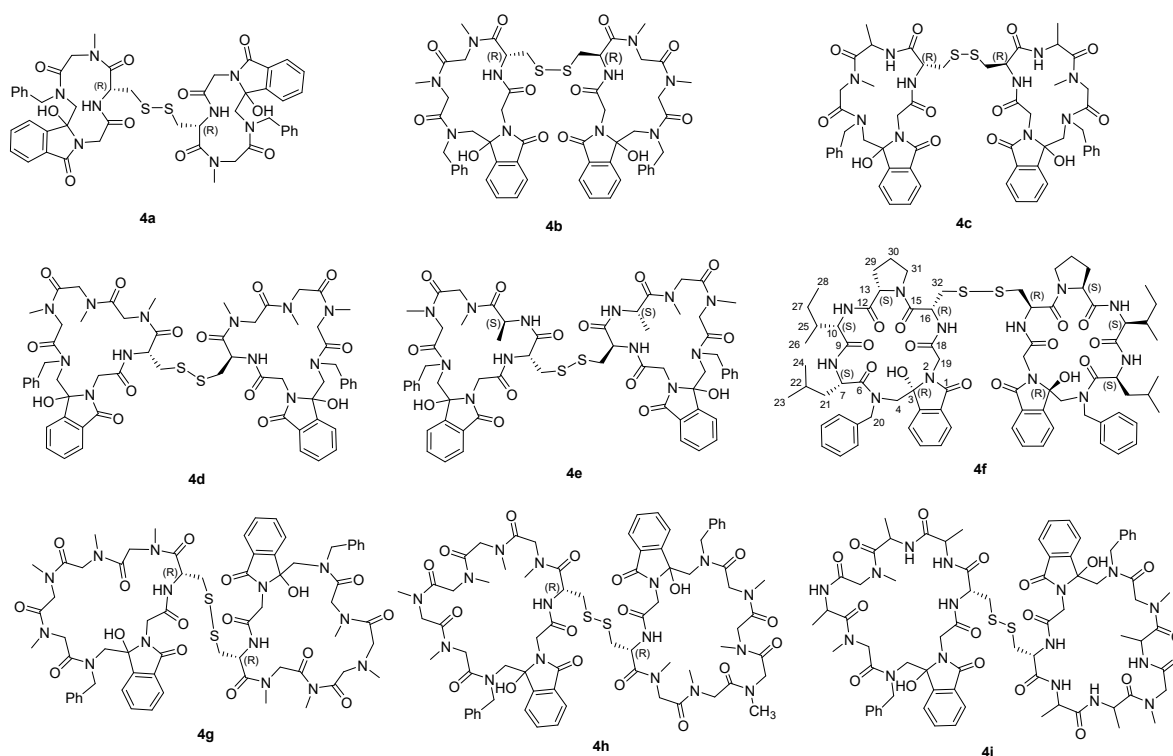

Figure S10. The structure of bicyclic peptides **4a~4i**.

**6. Table S1. Experimental and theoretical  $^1\text{H}$  and  $^{13}\text{C}$  isotropic chemical shifts of 4f.**

**Table S1. Experimental and theoretical  $^1\text{H}$  and  $^{13}\text{C}$  isotropic chemical shifts ( $\delta_{\text{iso}}$  /ppm) <sup>a</sup> and isotropic magnetic shielding tensors ( $\sigma_{\text{iso}}$  /ppm) of 4f.**

| Assignments  | $^1\text{H}$ NMR              |                                              |                                | Assignments | $^{13}\text{C}$ NMR   |                                              |                                |
|--------------|-------------------------------|----------------------------------------------|--------------------------------|-------------|-----------------------|----------------------------------------------|--------------------------------|
|              | $\sigma_{\text{iso}}$         | Calc. ( $\delta_{\text{iso}}$ ) <sup>a</sup> | Exp. ( $\delta_{\text{iso}}$ ) |             | $\sigma_{\text{iso}}$ | Calc. ( $\delta_{\text{iso}}$ ) <sup>a</sup> | Exp. ( $\delta_{\text{iso}}$ ) |
| H23,24,26,28 | 31.40, 31.19,<br>31.09, 31.01 | 0.56, 0.77,<br>0.87, 0.96                    | 0.51-0.99<br>(m,12H)           | C28         | 176.5                 | 7.6                                          | 14.1                           |
| H27          | 30.66                         | 1.30                                         | 1.15-1.30 (m,2H)               | C26         | 167.0                 | 17.0                                         | 15.6                           |
| H21,22       | 30.26, 30.19                  | 1.70, 1.77                                   | 1.38-1.76 (m,3H)               | C23         | 163.1                 | 20.9                                         | 22.7                           |
| H25,30,31    | 30.11, 29.96,                 | 1.84, 2.01,                                  | 1.80-2.32 (m,5H)               | C24         | 158.4                 | 25.6                                         | 22.7                           |
|              | 29.85, 29.76,<br>29.58        | 2.11, 2.19,<br>2.38                          |                                |             |                       |                                              |                                |
| H32          | 28.91                         | 3.05                                         | 2.58-2.95(m,2H)                | C30         | 154.4                 | 29.6                                         | 23.3                           |
| H29          | 28.71, 28.51                  | 3.25, 3.45                                   | 2.98-3.45 (m,2H)               | C22         | 154.1                 | 29.9                                         | 24.9                           |
| H19          | 28.34                         | 3.62                                         | 3.48-3.85(m,2H)                | C27         | 153.6                 | 30.4                                         | 29.7                           |
| H13          | 27.79                         | 4.17                                         | 4.18-4.28(m,1H)                | C32         | 153.4                 | 30.6                                         | 31.9                           |
| H4,20        | 27.73, 27.48                  | 4.2313, 4.4803                               | 4.32-4.79(m,4H)                | C29         | 151.7                 | 32.3                                         | 34.4                           |
| H7,10        | 27.34, 27.03                  | 4.62, 4.93                                   | 4.85-5.20(m,2H)                | C25         | 145.8                 | 38.2                                         | 37.2                           |
| H16          | 26.85                         | 5.11                                         | 5.21-5.38(m,1H)                | C21         | 140.8                 | 43.2                                         | 38.0                           |
| ArH          | 25.10, 24.81,                 | 6.86, 7.15,                                  | 6.86-7.98 (m,9H)               | C19         | 134.1                 | 49.9                                         | 41.3                           |
|              | 24.60, 24.34,<br>24.17        | 7.36, 7.62,<br>7.79                          |                                |             |                       |                                              |                                |
|              |                               |                                              |                                | C31         | 132.2                 | 51.8                                         | 43.8                           |
|              |                               |                                              |                                | C20         | 129.1                 | 54.9                                         | 49.0                           |
|              |                               |                                              |                                | C7          | 123.3                 | 60.7                                         | 49.6                           |
|              |                               |                                              |                                | C16         | 119.0                 | 65.1                                         | 51.3                           |
|              |                               |                                              |                                | C4          | 118.4                 | 65.6                                         | 56.7                           |
|              |                               |                                              |                                | C10         | 118.2                 | 65.9                                         | 57.7                           |
|              |                               |                                              |                                | C13         | 115.1                 | 68.9                                         | 62.6                           |
|              |                               |                                              |                                | C3          | 86.9                  | 97.1                                         | 97.0                           |
|              |                               |                                              |                                | CPh         | 55.4                  | 128.6                                        | 120.6                          |
|              |                               |                                              |                                | CPh         | 52.6                  | 131.4                                        | 123.5                          |
|              |                               |                                              |                                | CPh         | 52.3                  | 131.7                                        | 127.8                          |
|              |                               |                                              |                                | CPh         | 50.3                  | 133.7                                        | 128.9                          |
|              |                               |                                              |                                | CPh         | 49.9                  | 134.2                                        | 132.6                          |
|              |                               |                                              |                                | CPh         | 47.5                  | 136.5                                        | 134.1                          |
|              |                               |                                              |                                | CPh         | 47.1                  | 136.9                                        | 134.1                          |
|              |                               |                                              |                                | CPh         | 47.1                  | 137.0                                        | 136.3                          |
|              |                               |                                              |                                | CPh         | 45.5                  | 138.5                                        | 136.3                          |
|              |                               |                                              |                                | CPh         | 43.4                  | 140.6                                        | 138.3                          |
|              |                               |                                              |                                | CPh         | 37.0                  | 147.1                                        | 146.9                          |
|              |                               |                                              |                                | C18         | 26.9                  | 157.1                                        | 159.6                          |
|              |                               |                                              |                                | C1          | 7.9                   | 176.1                                        | 160.0                          |
|              |                               |                                              |                                | C12         | 4.9                   | 179.2                                        | 161.6                          |
|              |                               |                                              |                                | C9          | 2.0                   | 182.0                                        | 164.5                          |
|              |                               |                                              |                                | C6          | 0.5                   | 183.5                                        | 167.7                          |
|              |                               |                                              |                                | C15         | 0.3                   | 183.7                                        | 168.2                          |

<sup>a</sup>  $\delta_{\text{isoH}}$  and  $\delta_{\text{isoC}}$  were calculated by Equations  $\delta_{\text{isoX}} = \sigma_{\text{isoTMS-X}} - \sigma_{\text{isoX}}$ .

( $\sigma_{\text{isoTMS-H}} = 31.9695$ ,  $\sigma_{\text{isoTMS-C}} = 184.0330$ ); TMS = Tetramethylsilane

## 7. $^1\text{H}$ , $^{13}\text{C}$ -NMR and HRMS of bis-linear peptides and bis-cyclic peptides.

### (1) $^1\text{H}$ , $^{13}\text{C}$ -NMR and HRMS of **3a**.

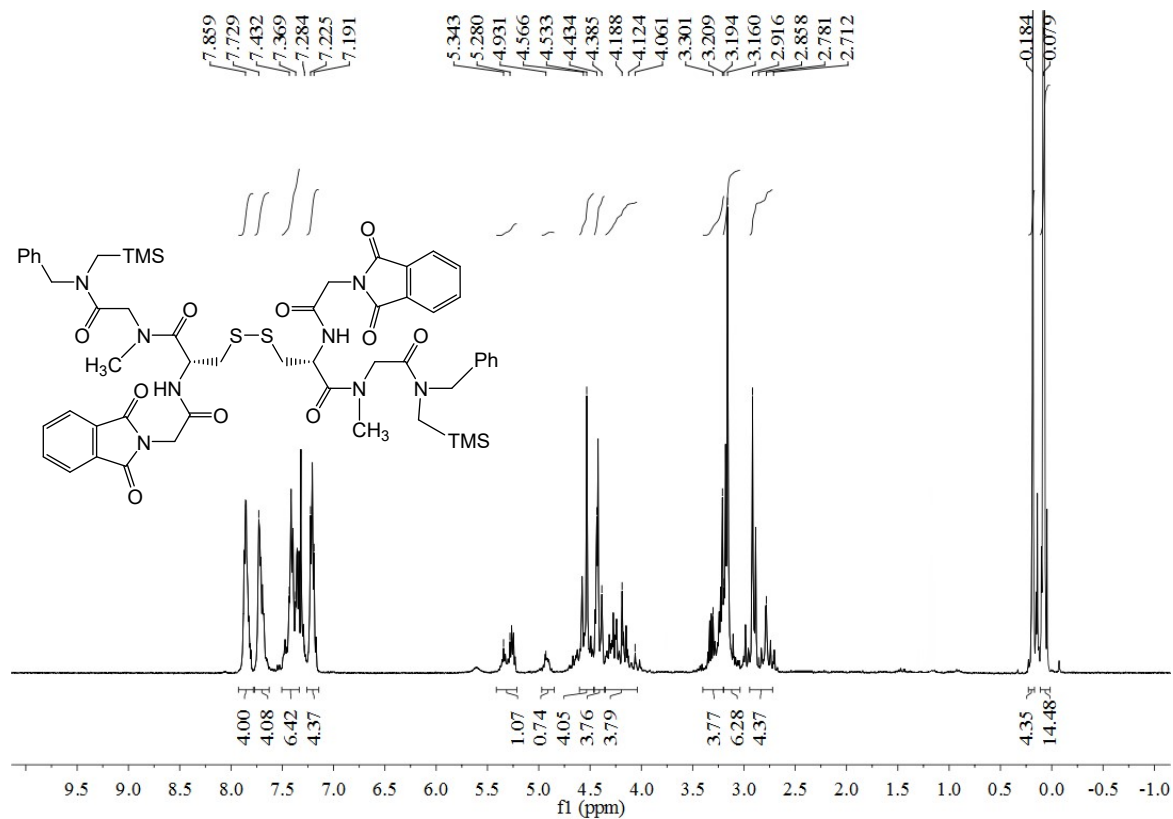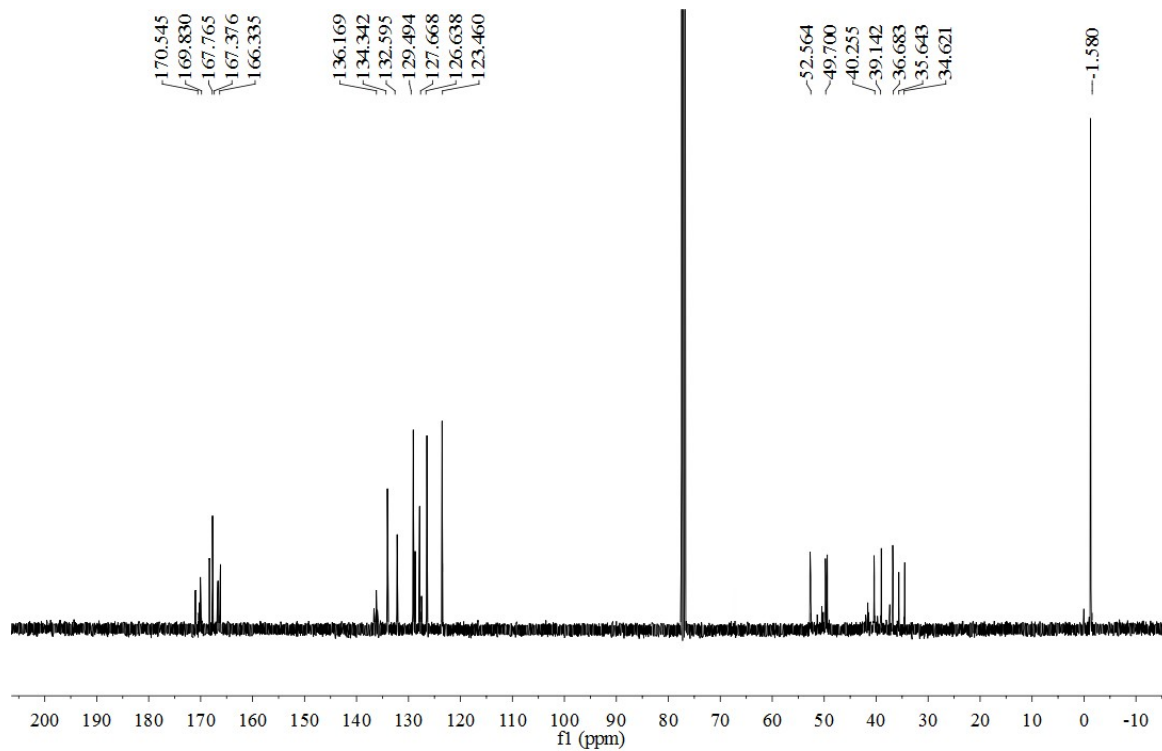

1-39 #16 RT: 0.09 AV: 1 NL: 1.08E8  
T: FTMS + p ESI Full lock ms [80.0000-1200.0000]

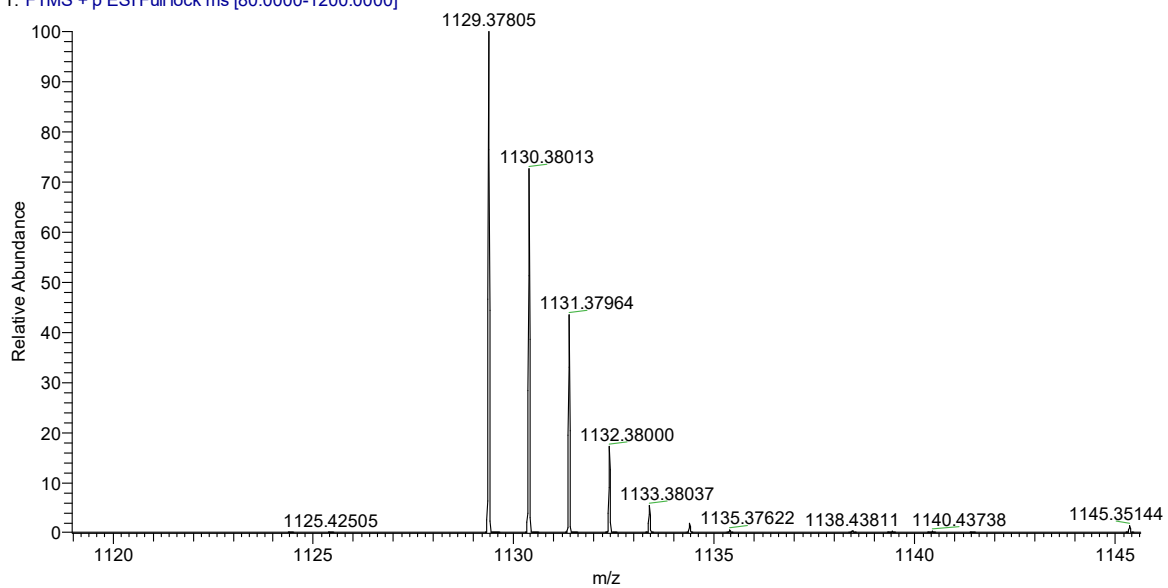

(2)  $^1\text{H}$ ,  $^{13}\text{C}$ -NMR and HRMS of **4a**.

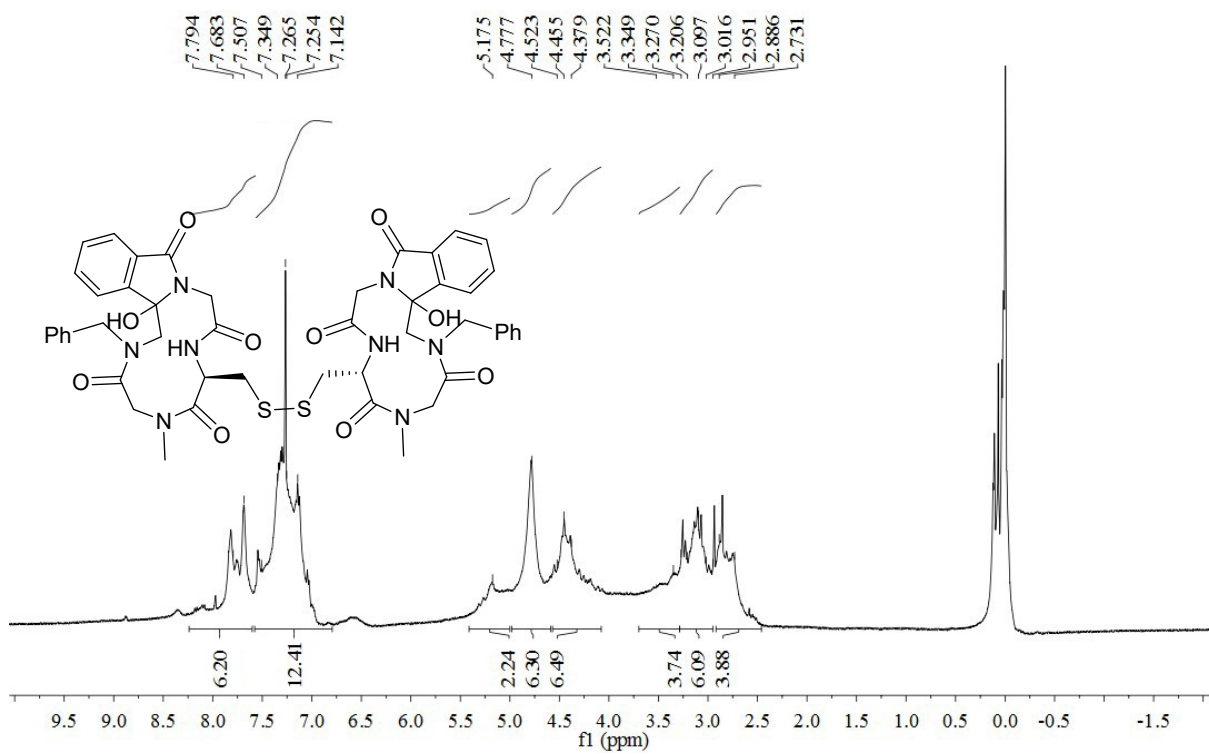

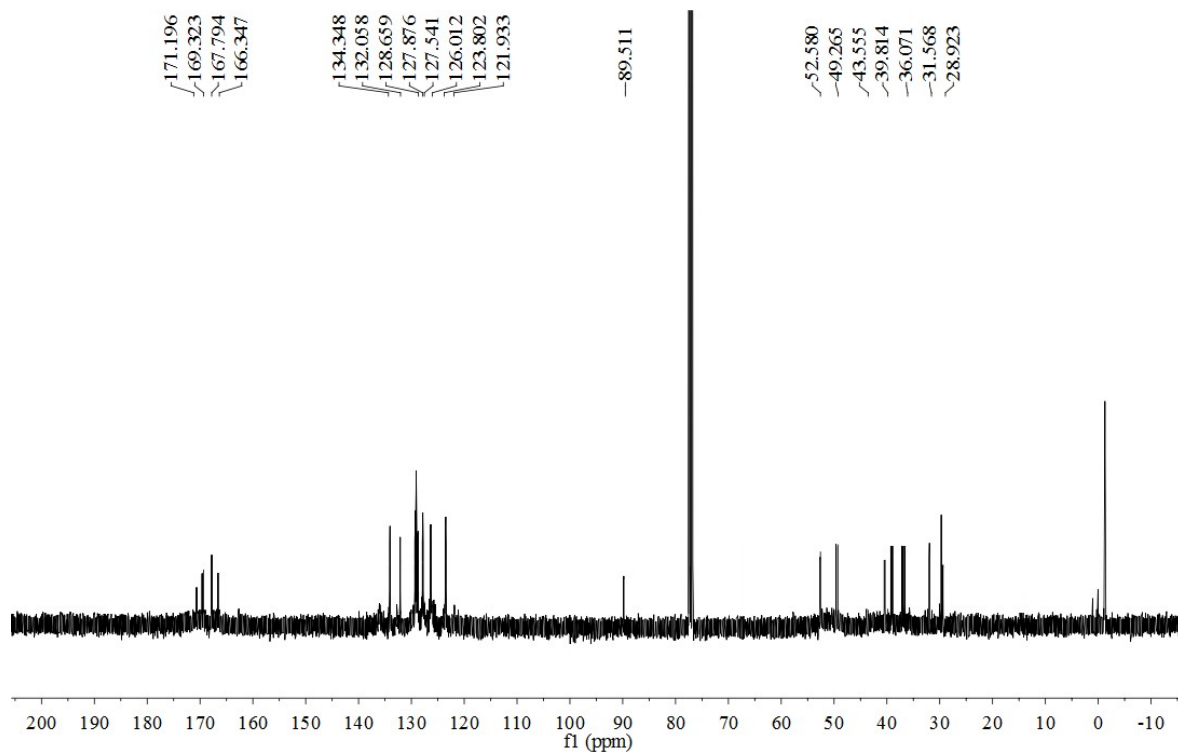

1-40 #20 RT: 0.11 AV: 1 NL: 5.73E6  
T: FTMS + p ESI Full lock ms [80.0000-1200.0000]

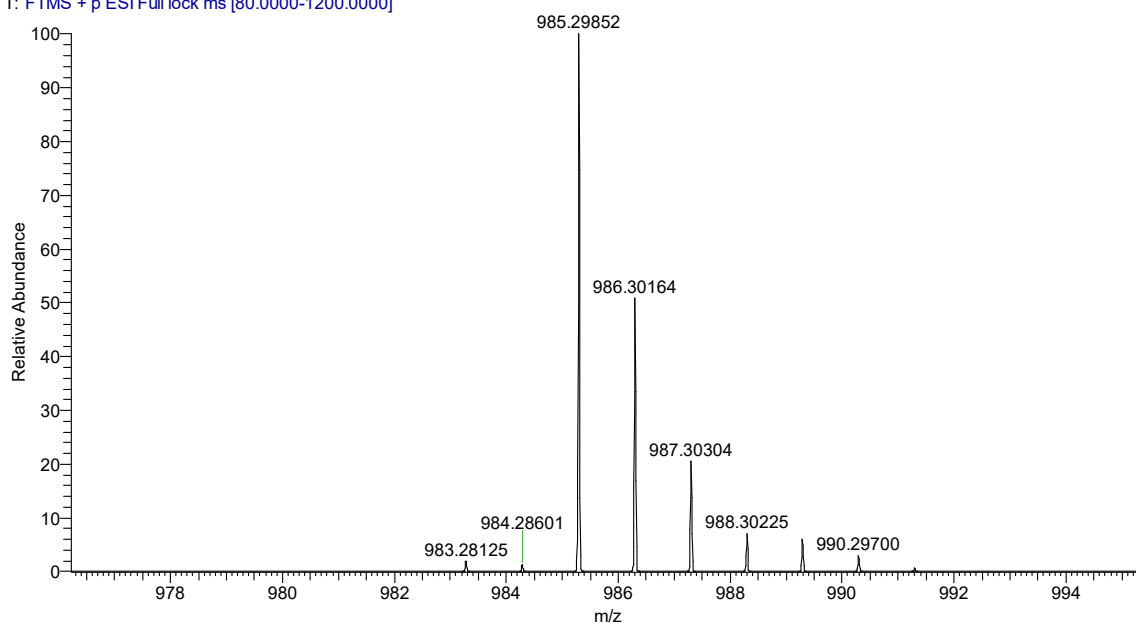

(3)  $^1\text{H}$ ,  $^{13}\text{C}$ -NMR and HRMS of **3b**.

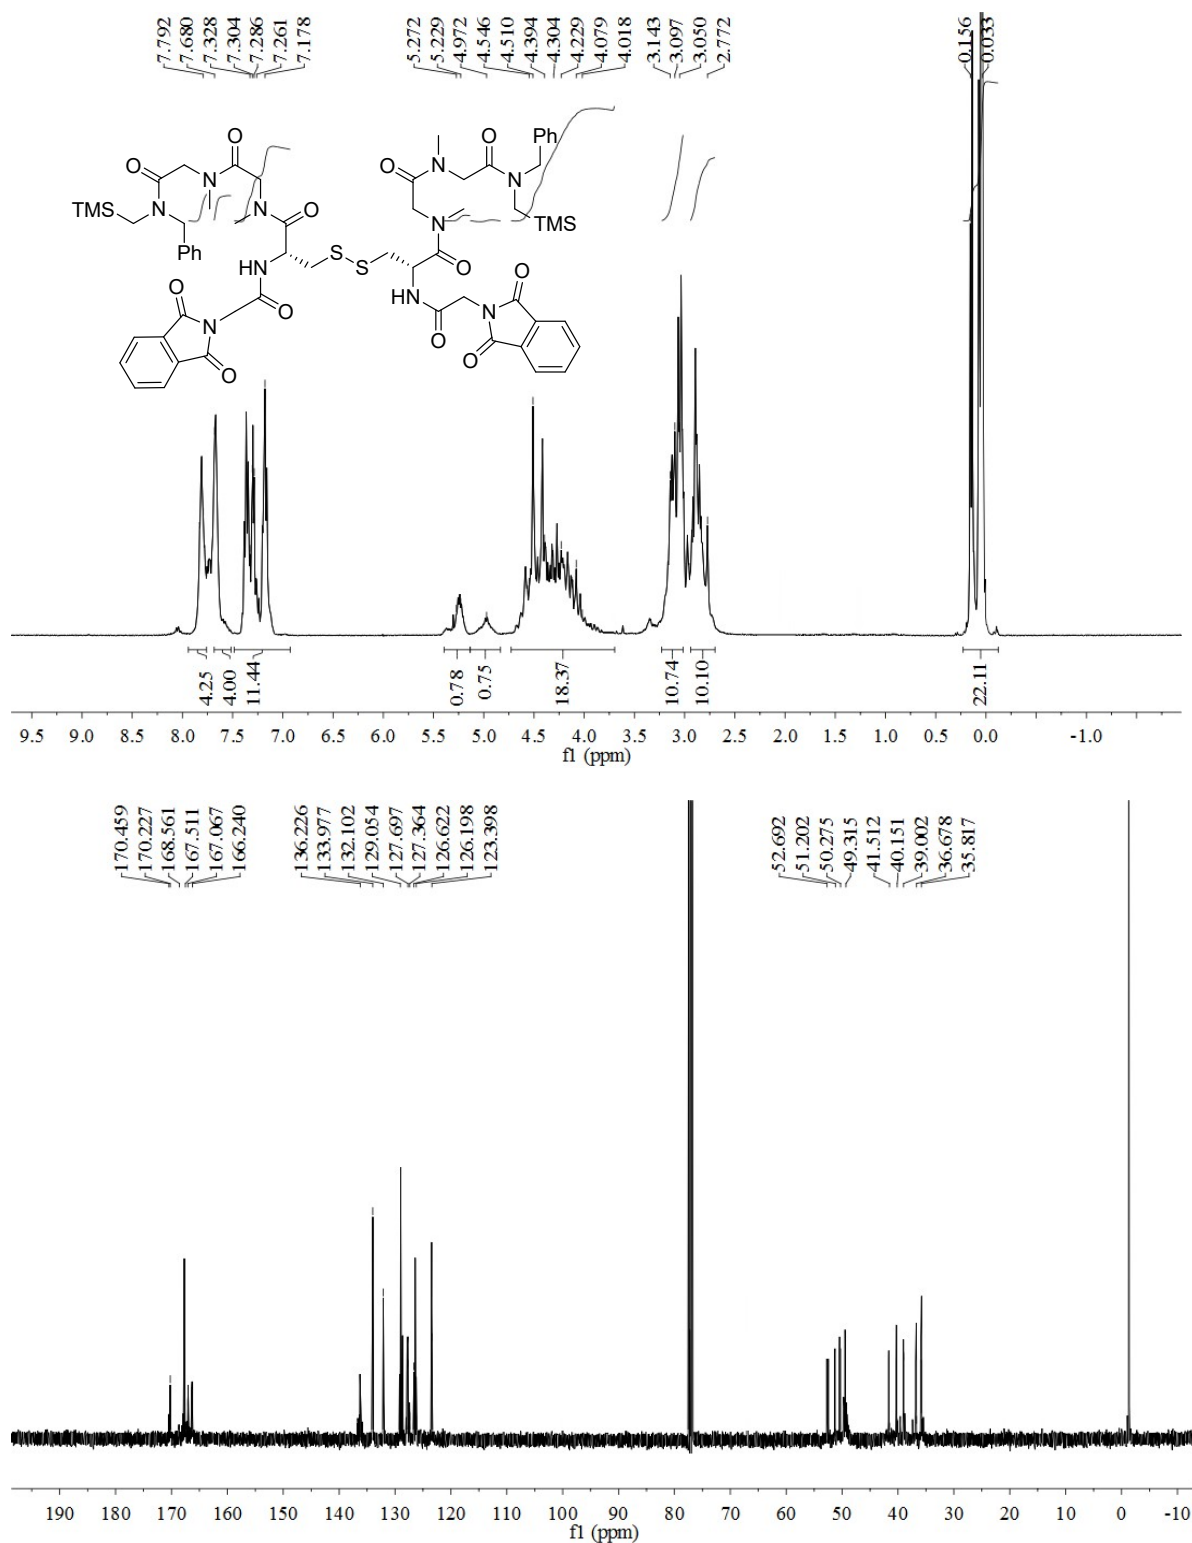



1-41 #62 RT: 0.34 AV: 1 NL: 1.16E6  
T: FTMS + p ESI Full lock ms [150.0000-2250.0000]

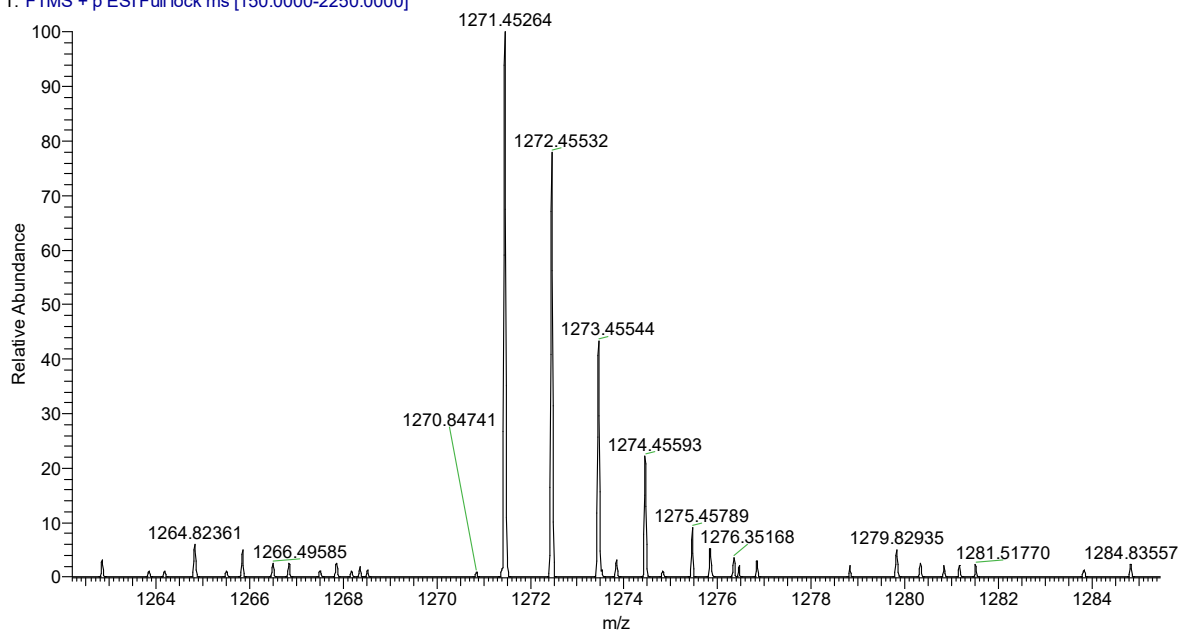

(4)  $^1\text{H}$ ,  $^{13}\text{C}$ -NMR and HRMS of **4b**.

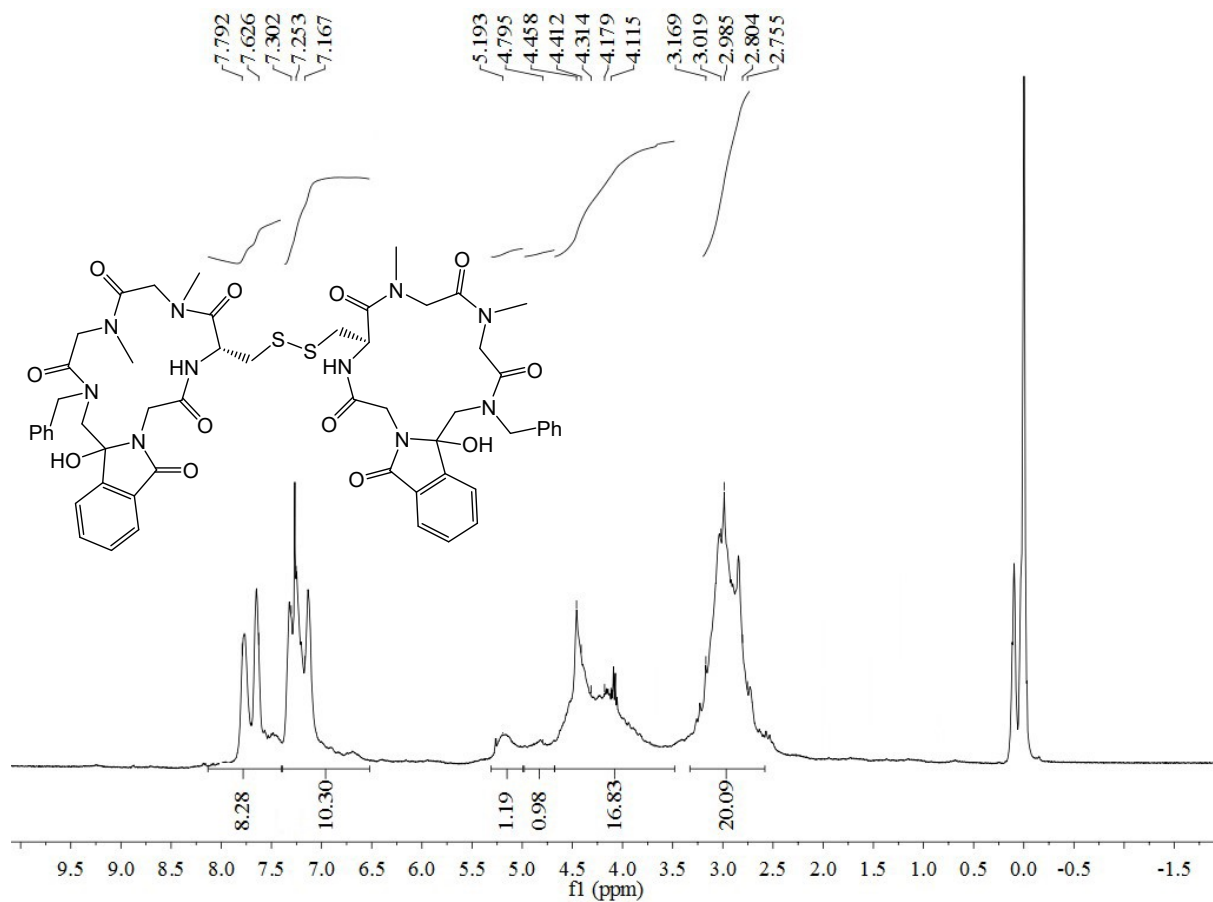

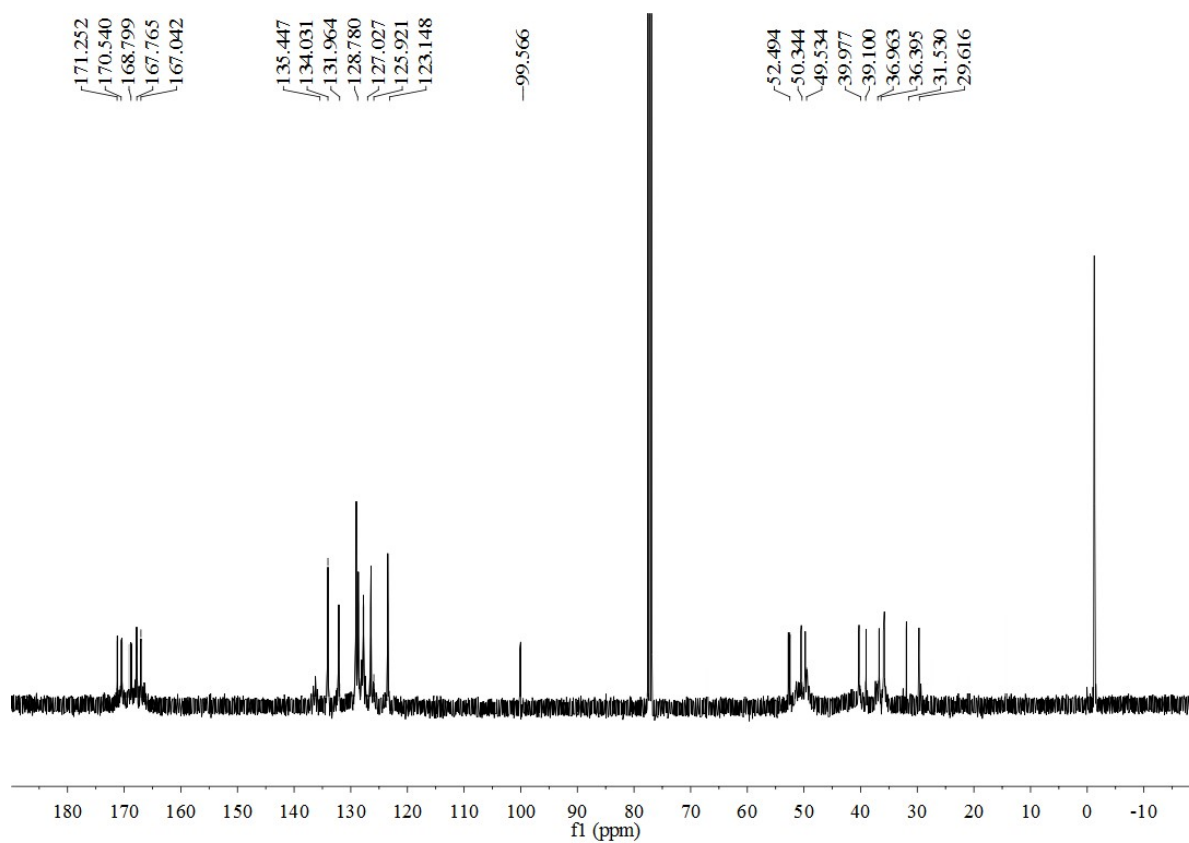

1-42 #21 RT: 0.12 AV: 1 NL: 4.13E6  
 T: FTMS + p ESI Full lock ms [150.0000-2250.0000]

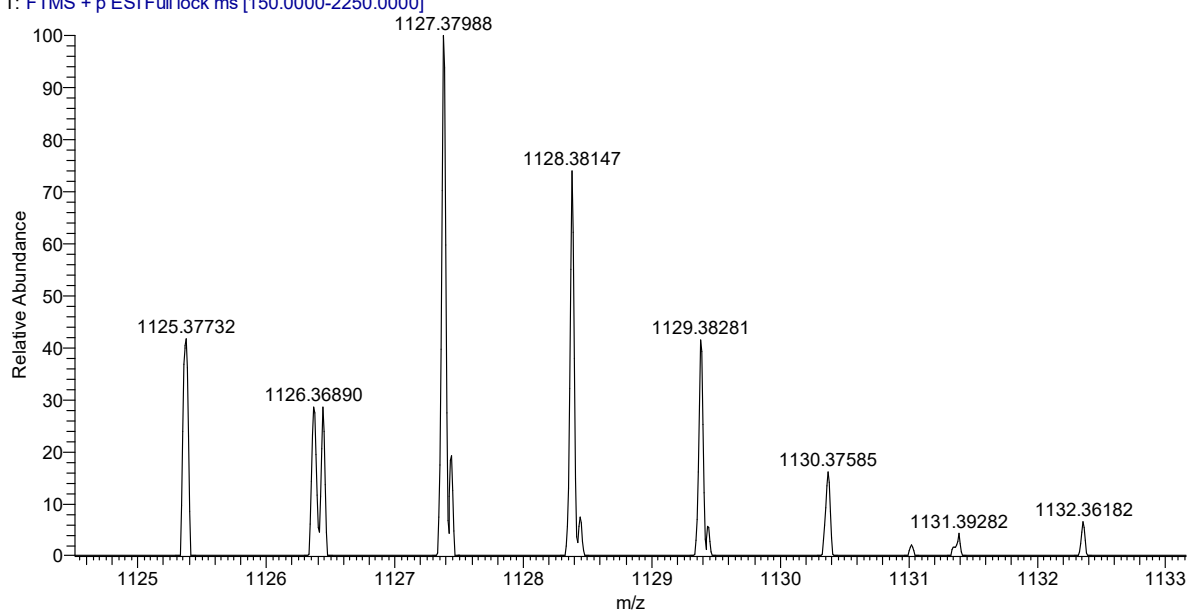

(5)  $^1\text{H}$ ,  $^{13}\text{C}$ -NMR and HRMS of **3c**.

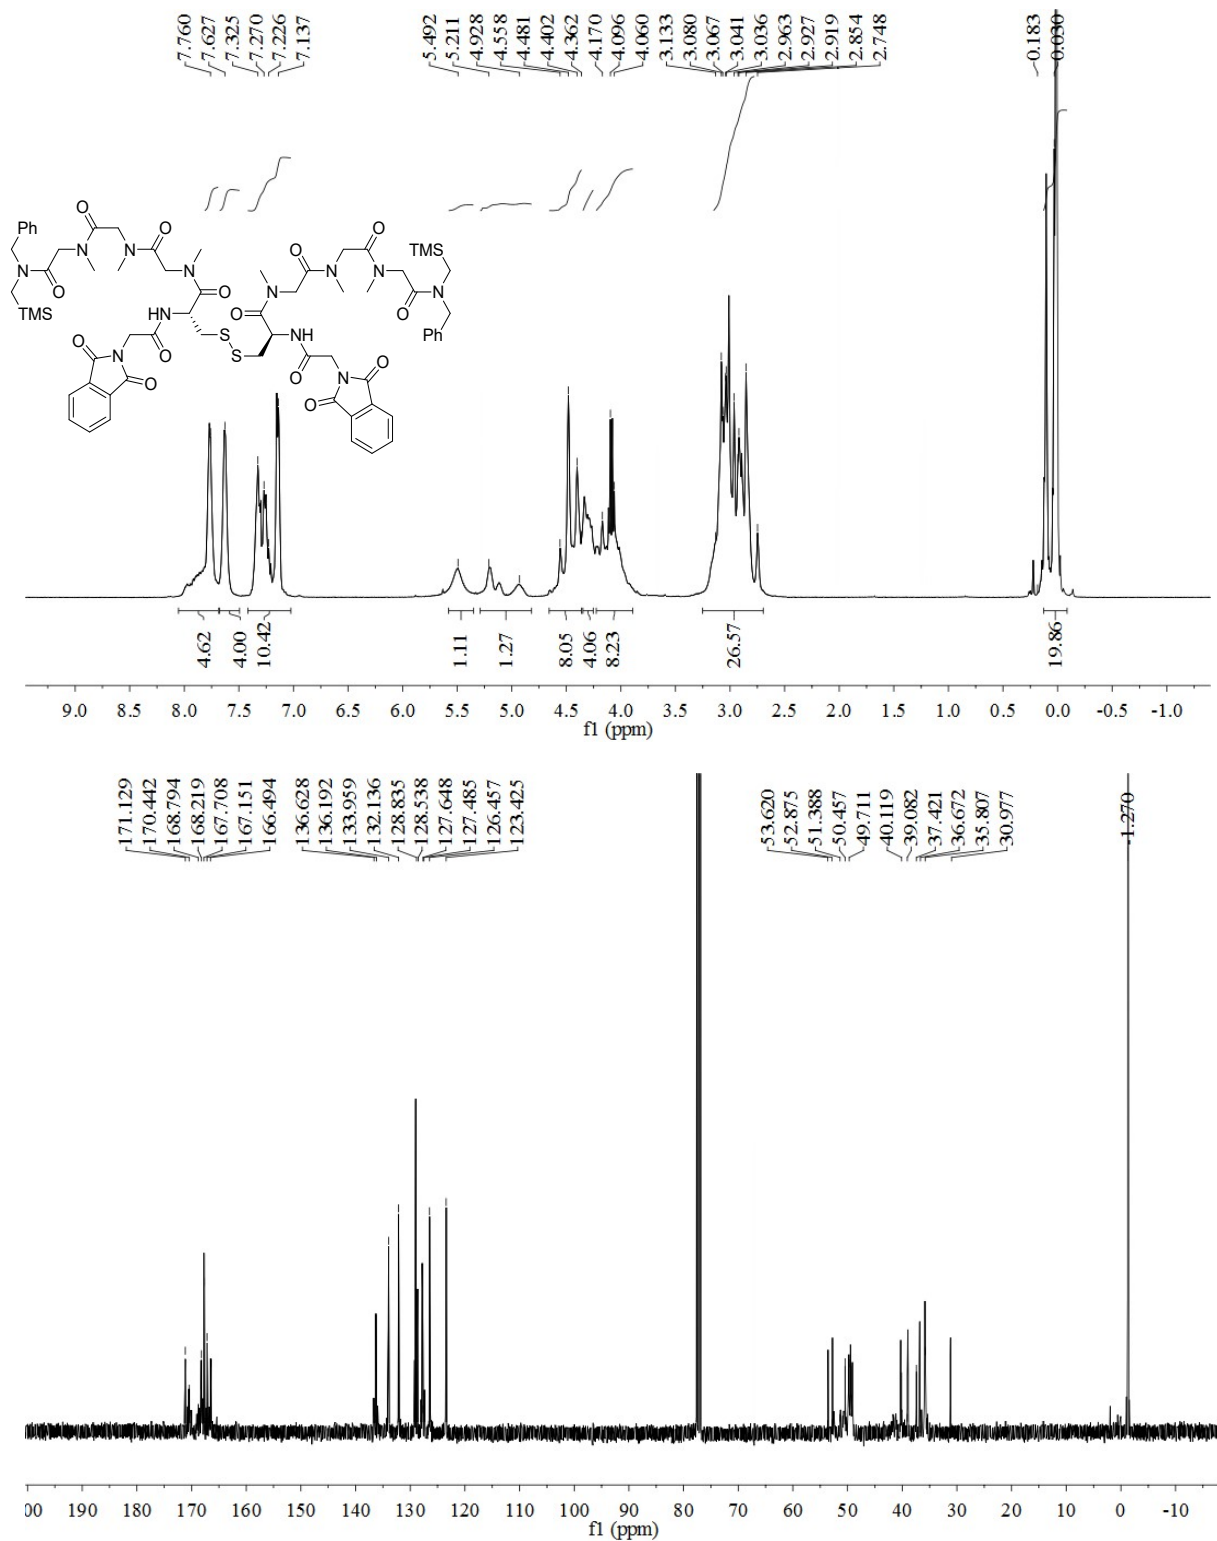

1-43 #41 RT: 0.22 AV: 1 NL: 4.27E7  
T: FTMS + p ESI Full lock ms [150.0000-2250.0000]

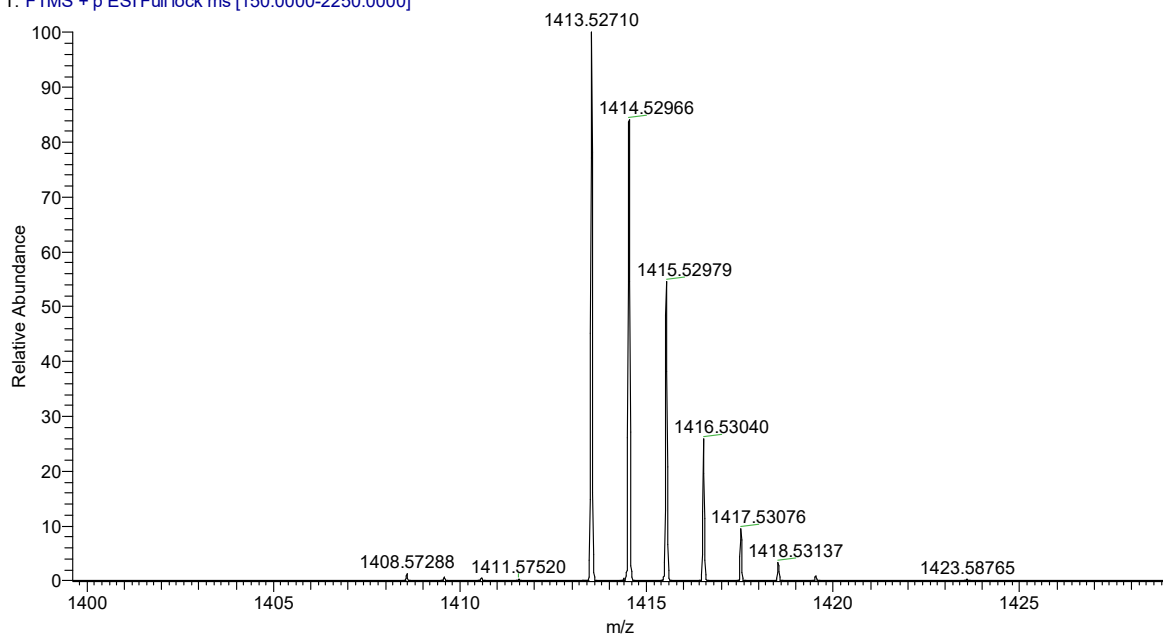

(6)  $^1\text{H}$ ,  $^{13}\text{C}$ -NMR and HRMS of **4c**.

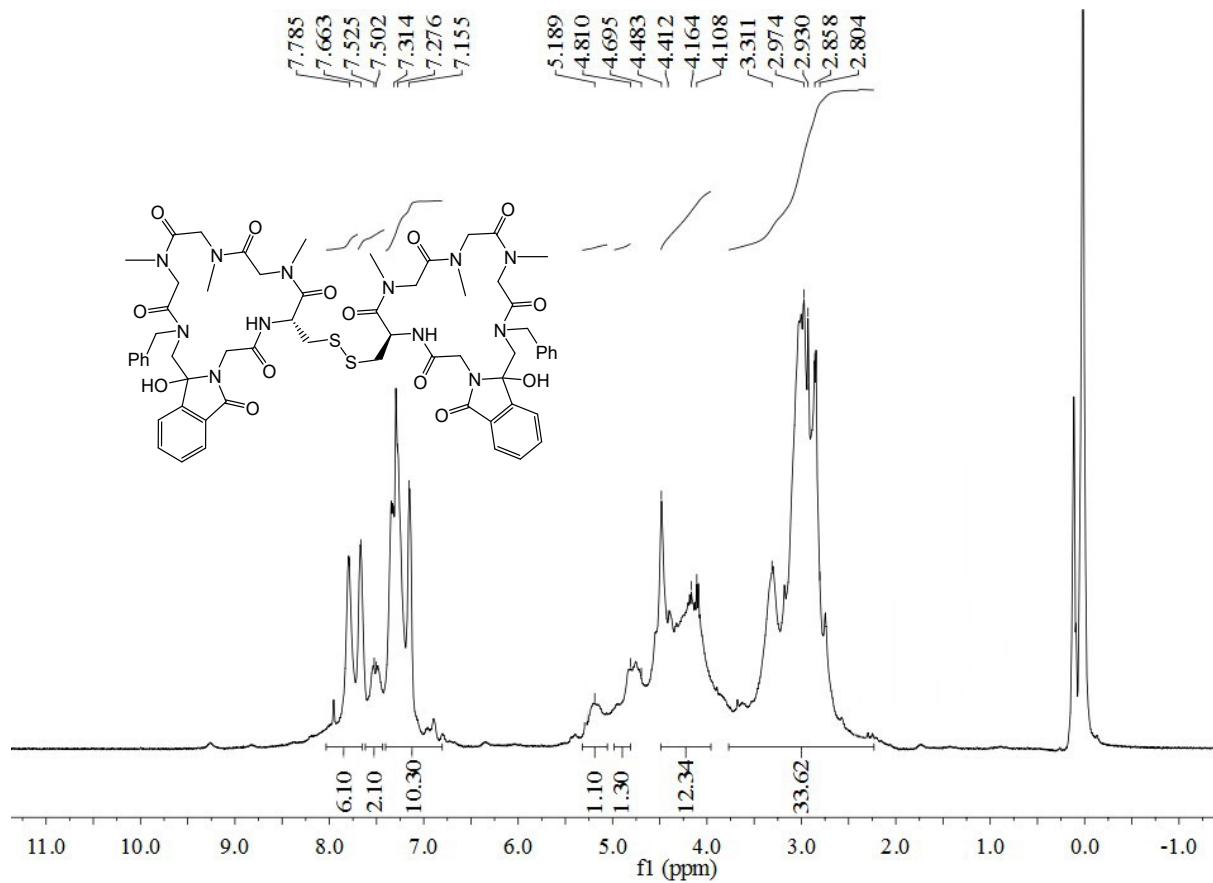

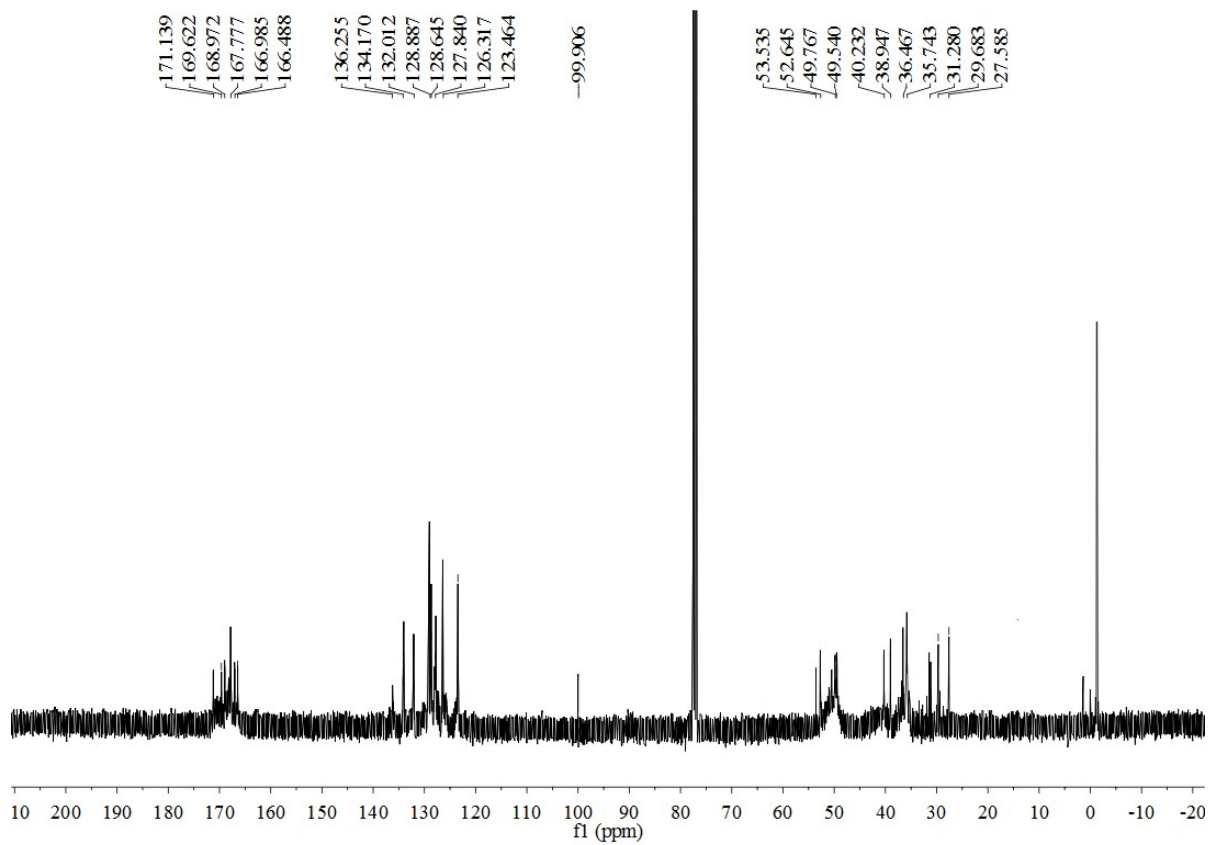

1-44 #52 RT: 0.28 AV: 1 NL: 1.56E5  
T: FTMS + p ESI Full lock ms [150.0000-2250.0000]

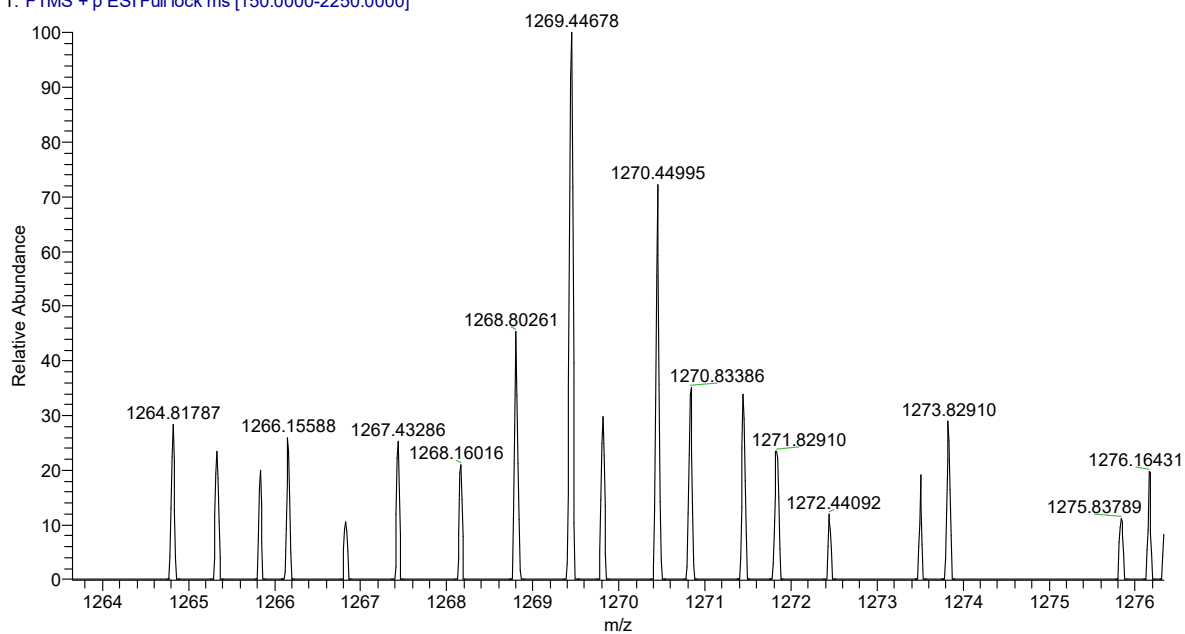

(7)  $^1\text{H}$ ,  $^{13}\text{C}$ -NMR and HRMS of **3d**.

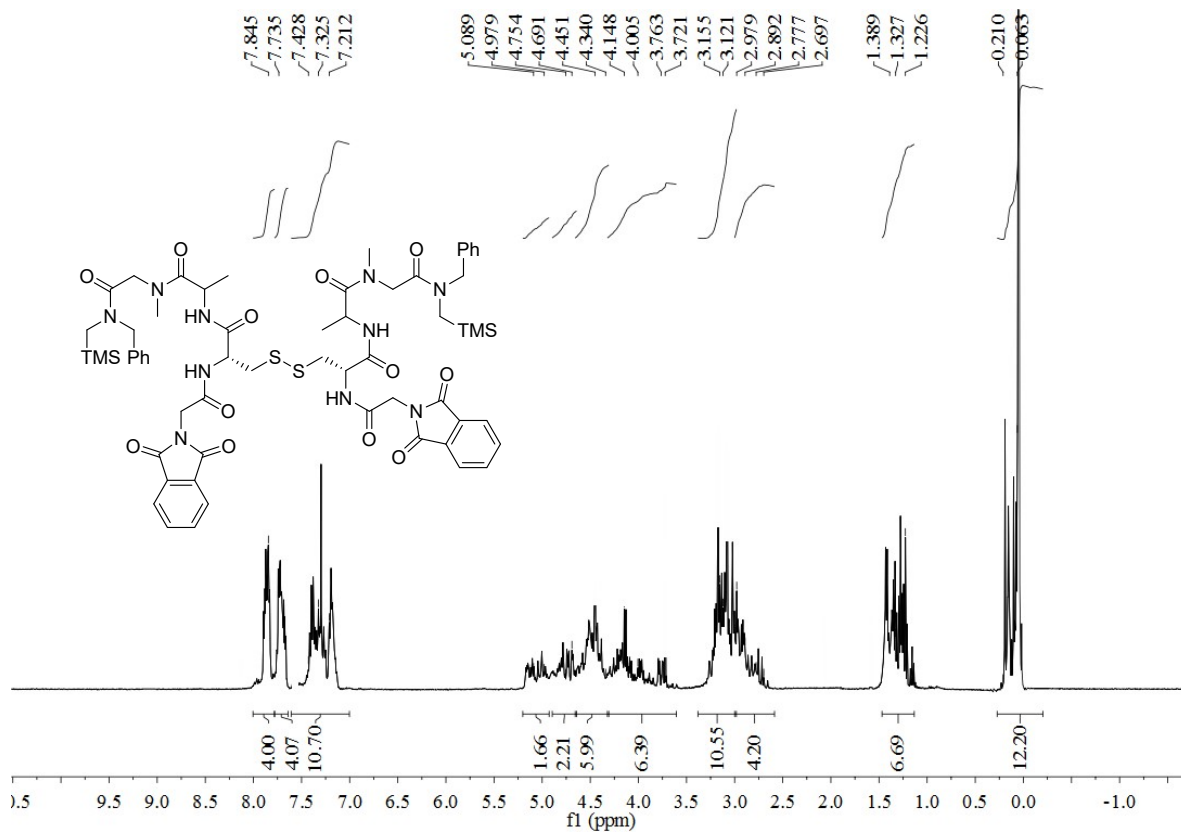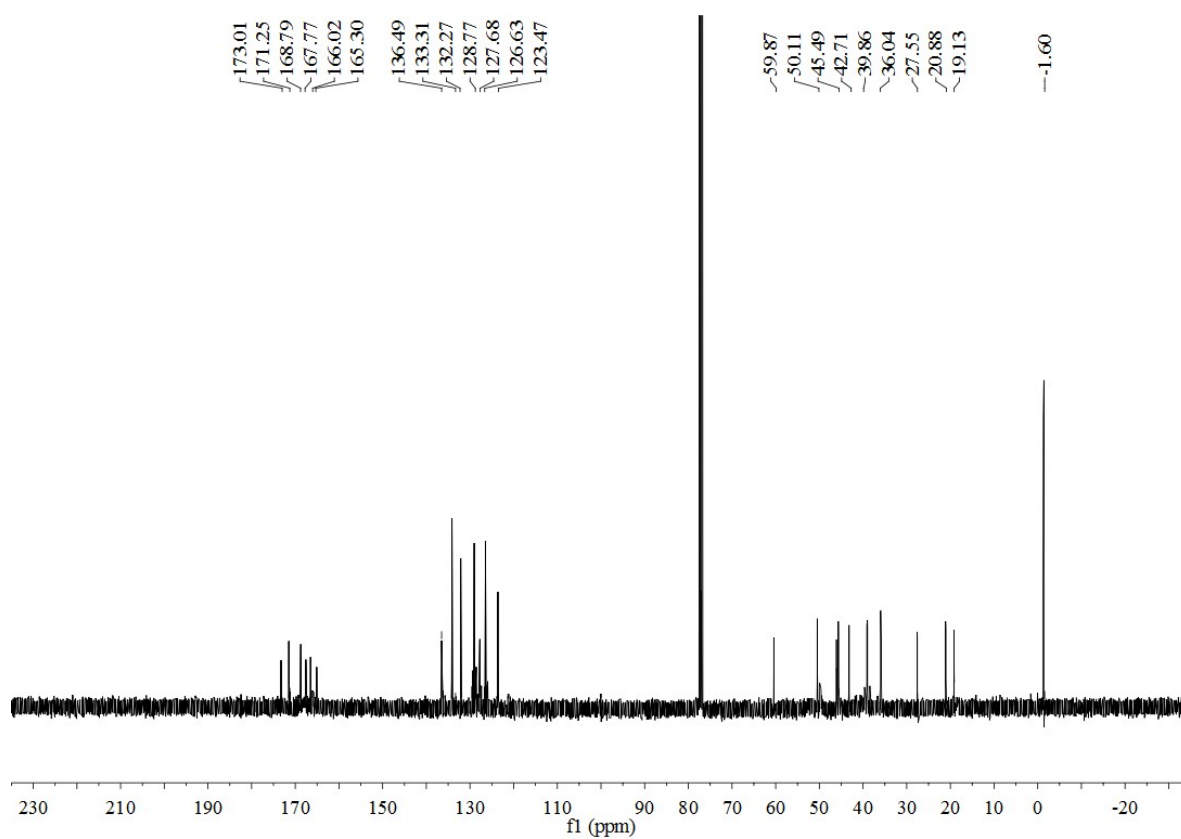

1-15 #12 RT: 0.07 AV: 1 NL: 3.97E7  
T: FTMS + p ESI Full lock ms [150.0000-2250.0000]

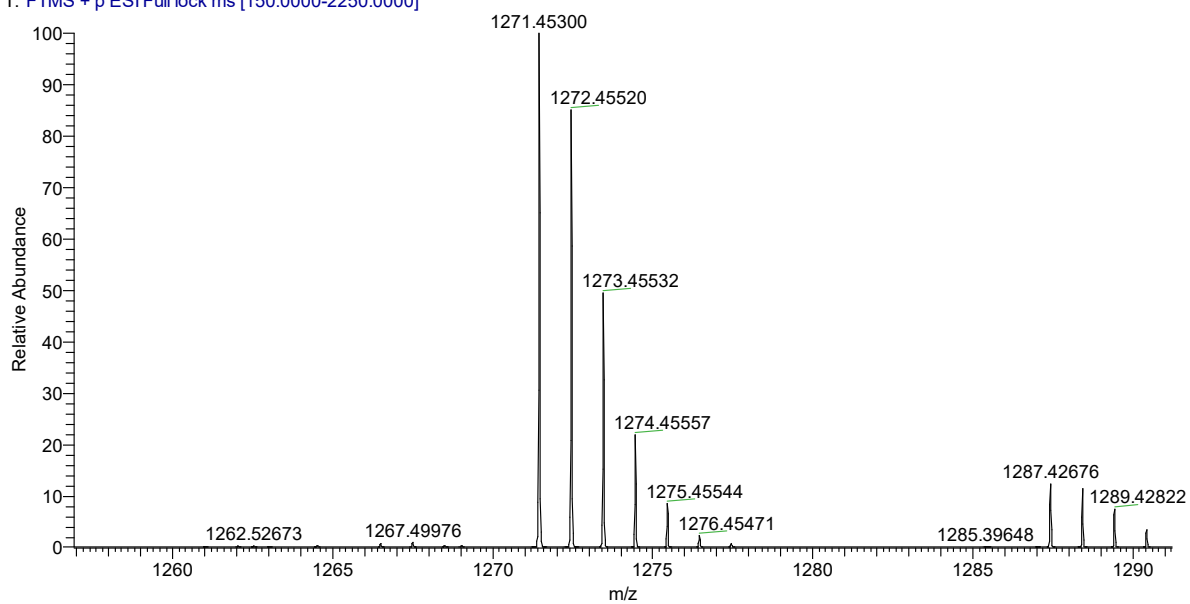

(8)  $^1\text{H}$ ,  $^{13}\text{C}$ -NMR and HRMS of **4d**.

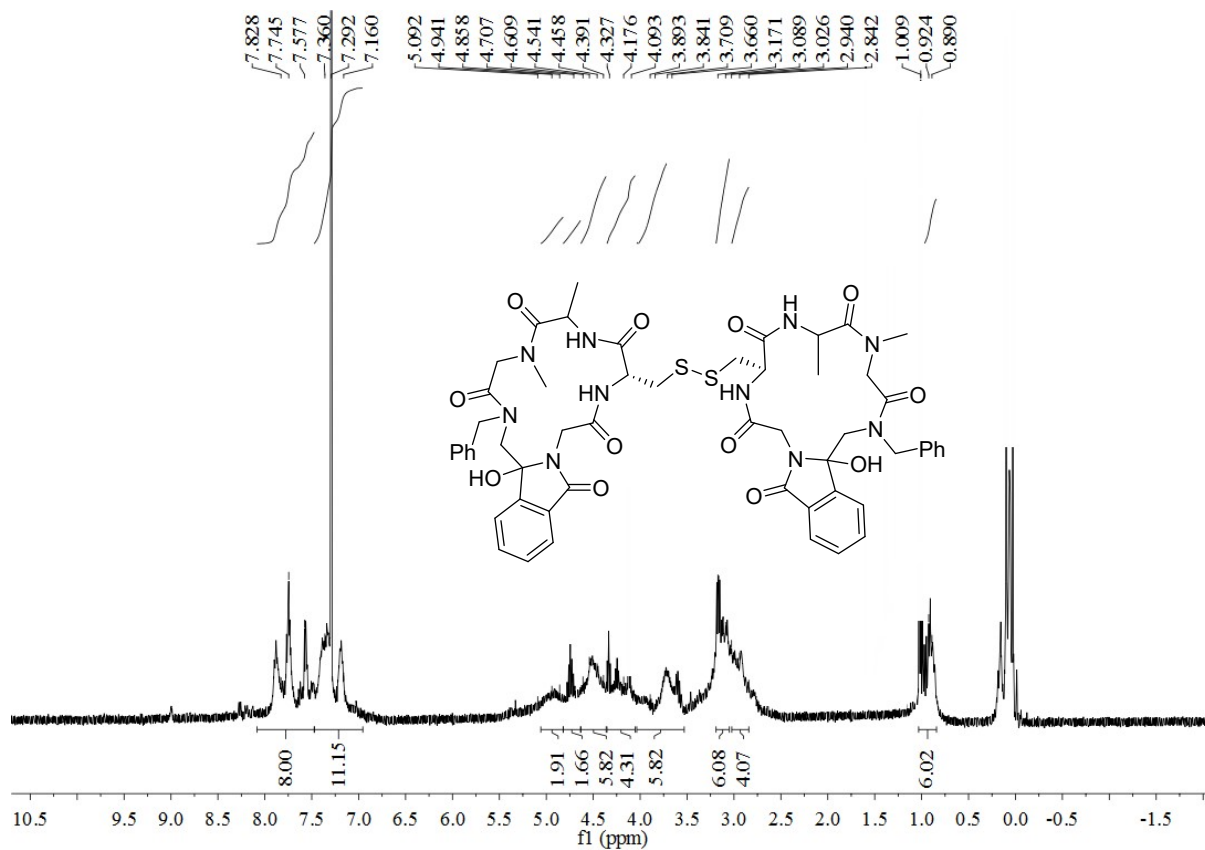

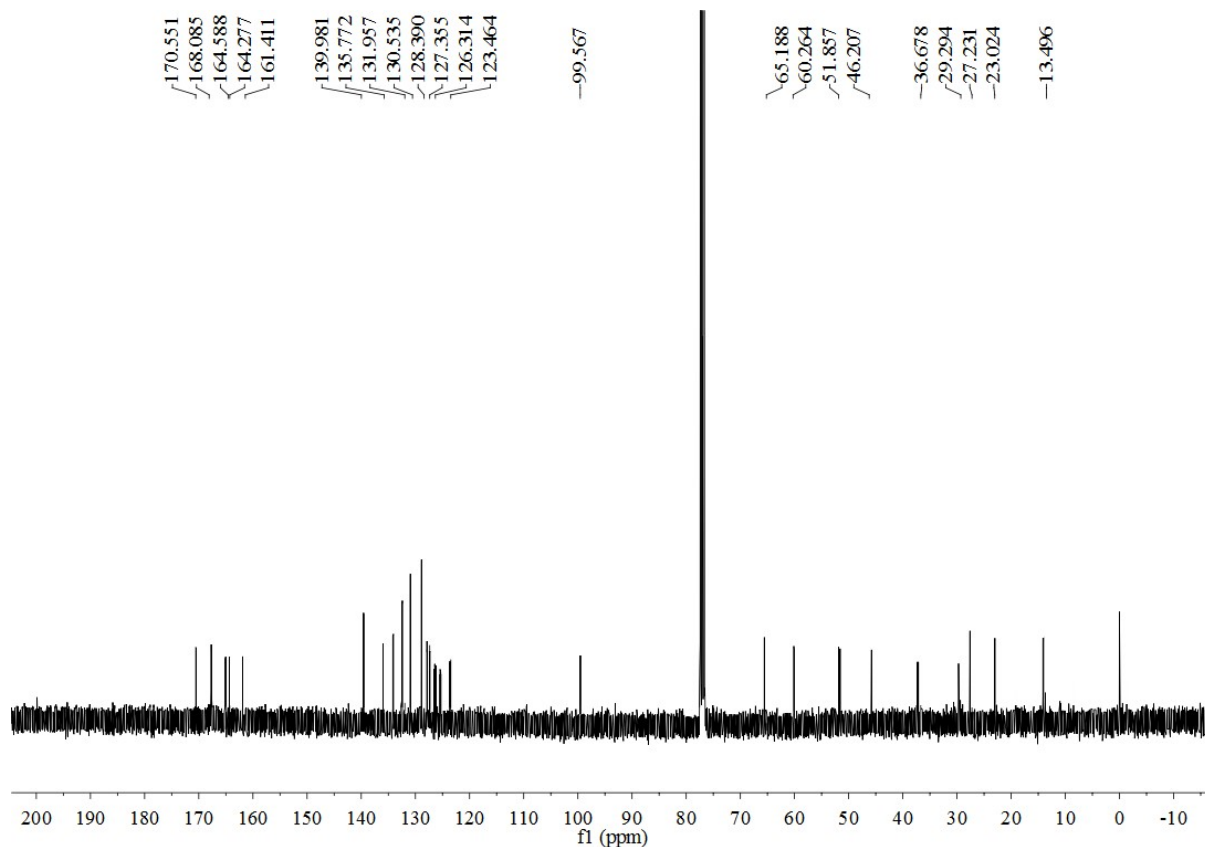

1-16 #19 RT: 0.10 AV: 1 NL: 2.83E6  
 T: FTMS + p ESI Full lock ms [150.0000-2250.0000]

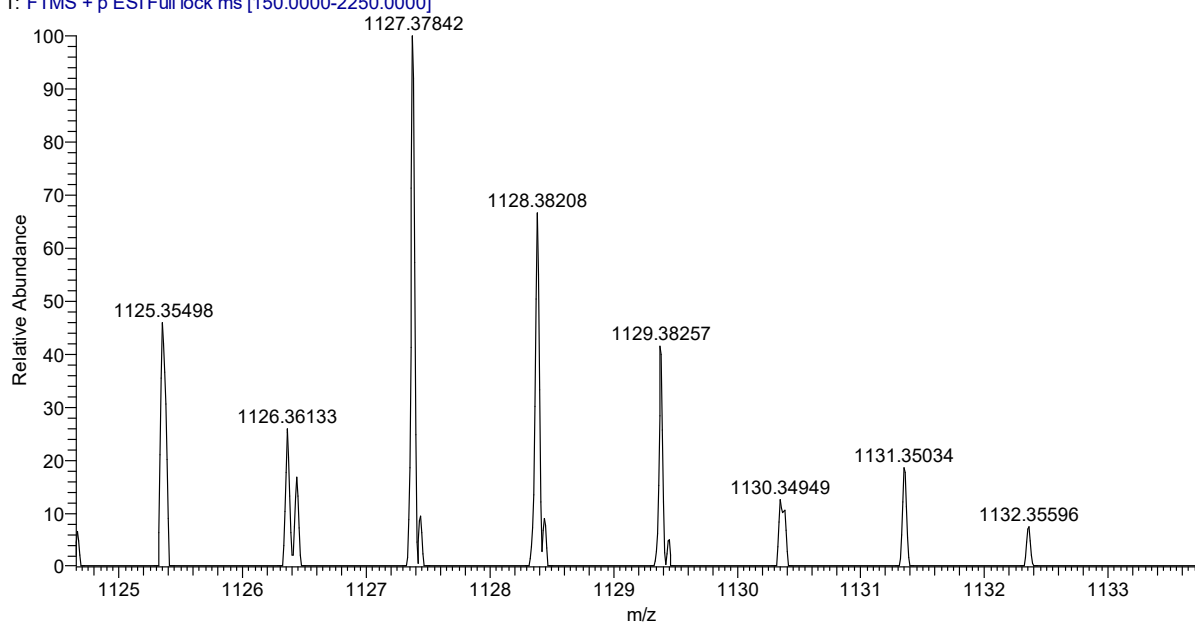



(9)  $^1\text{H}$ ,  $^{13}\text{C}$ -NMR and HRMS of **3e**.

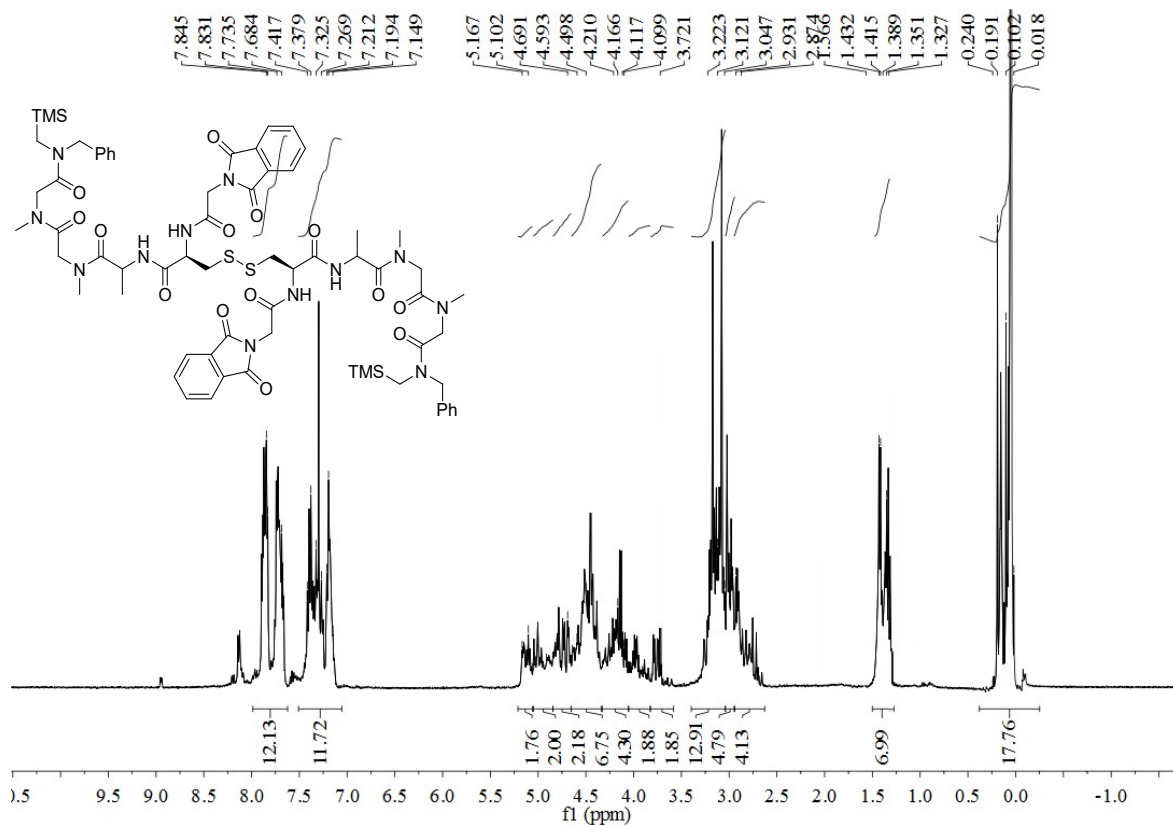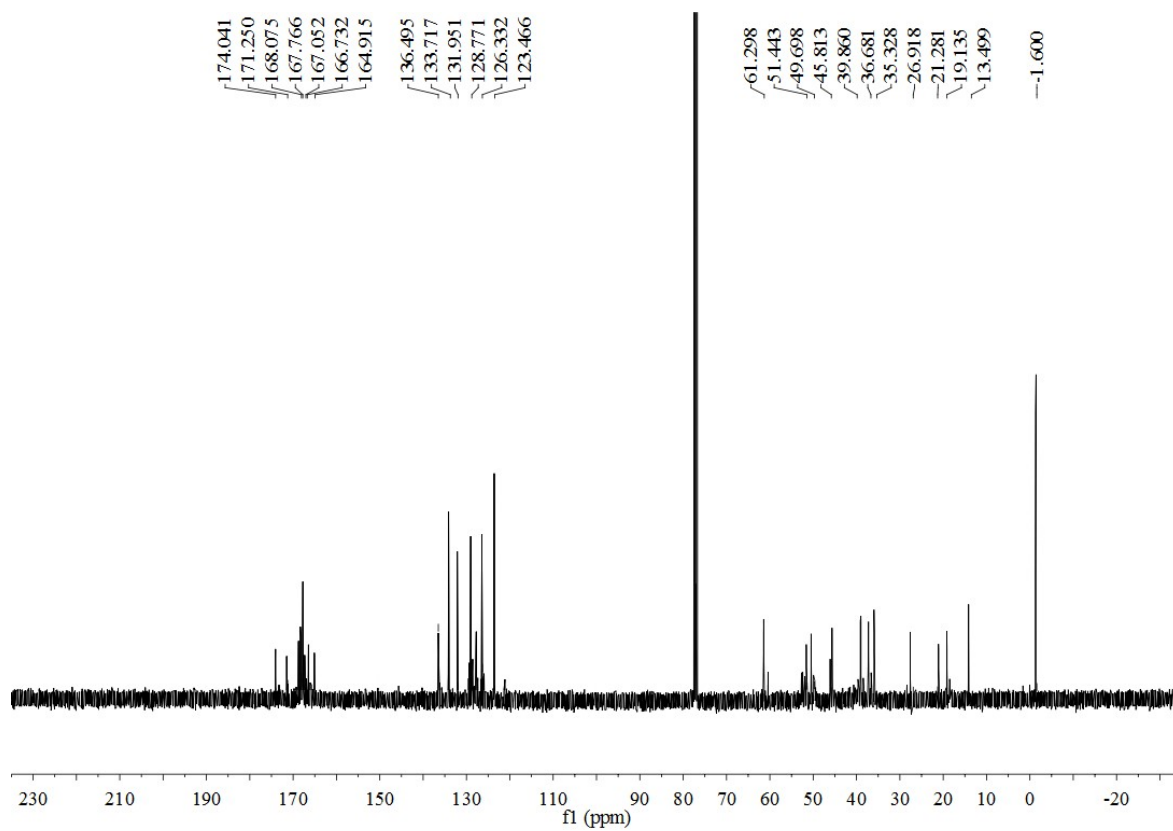

1-13 #24 RT: 0.13 AV: 1 NL: 4.79E7  
T: FTMS + p ESI Full lock ms [150.0000-2250.0000]

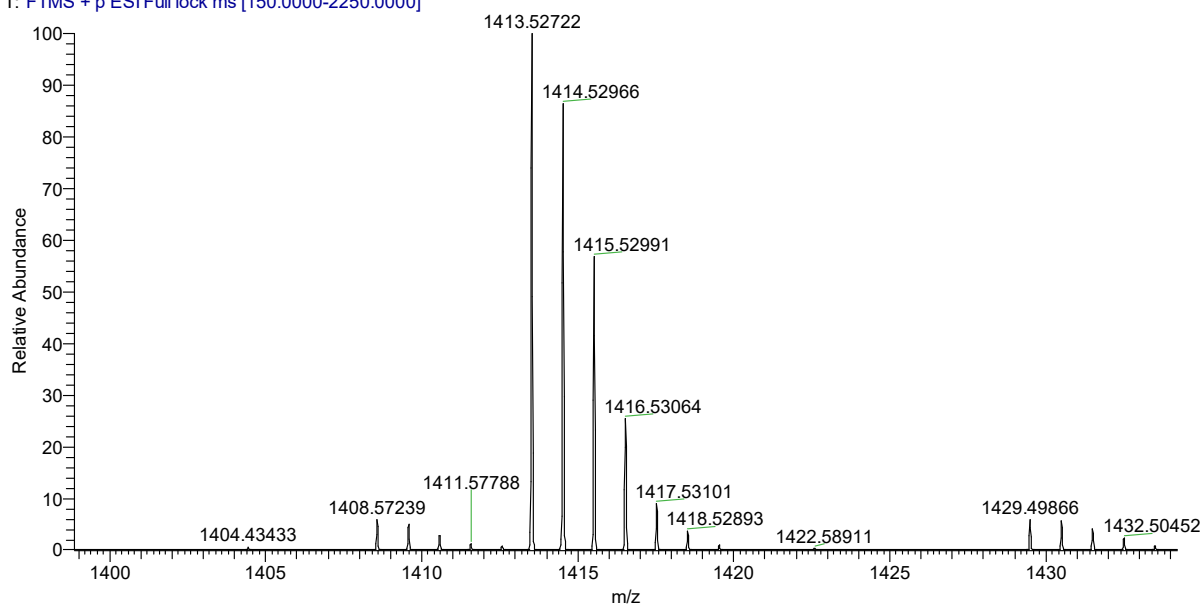

(10)  $^1\text{H}$ ,  $^{13}\text{C}$ -NMR and HRMS of **4e**.

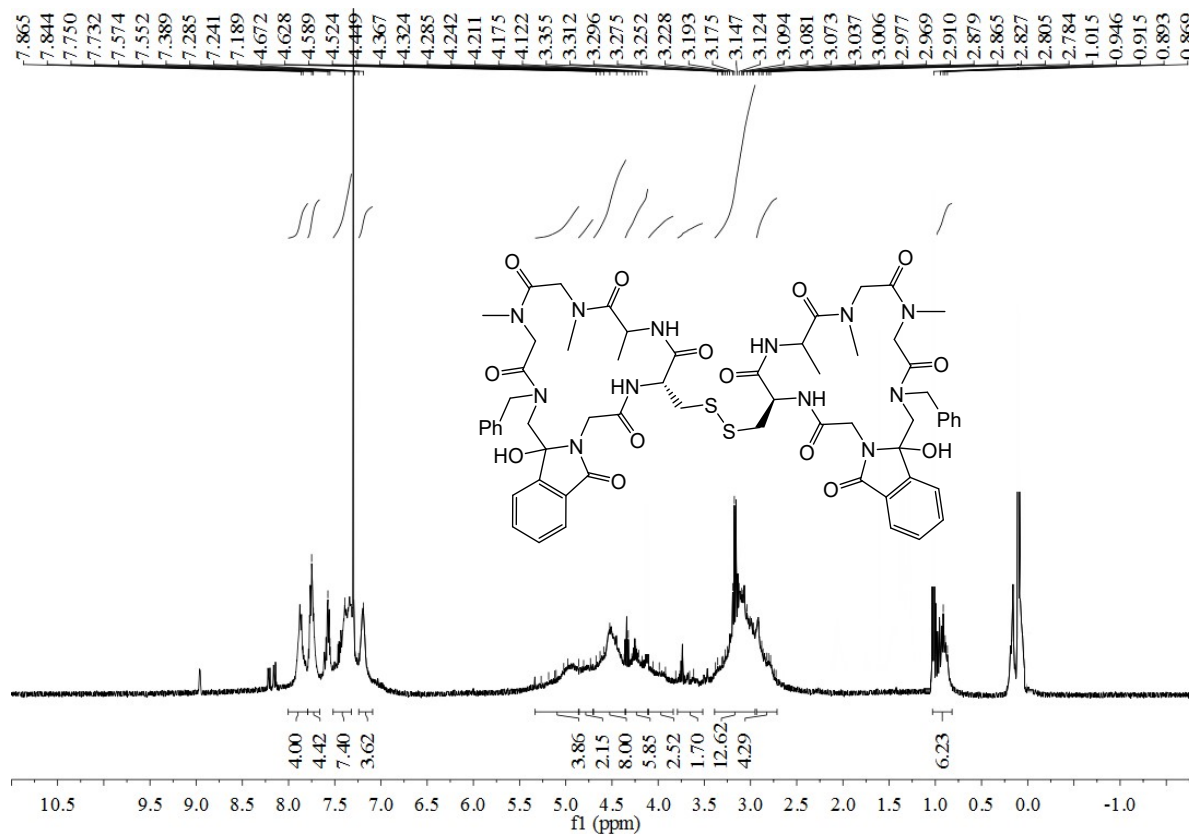

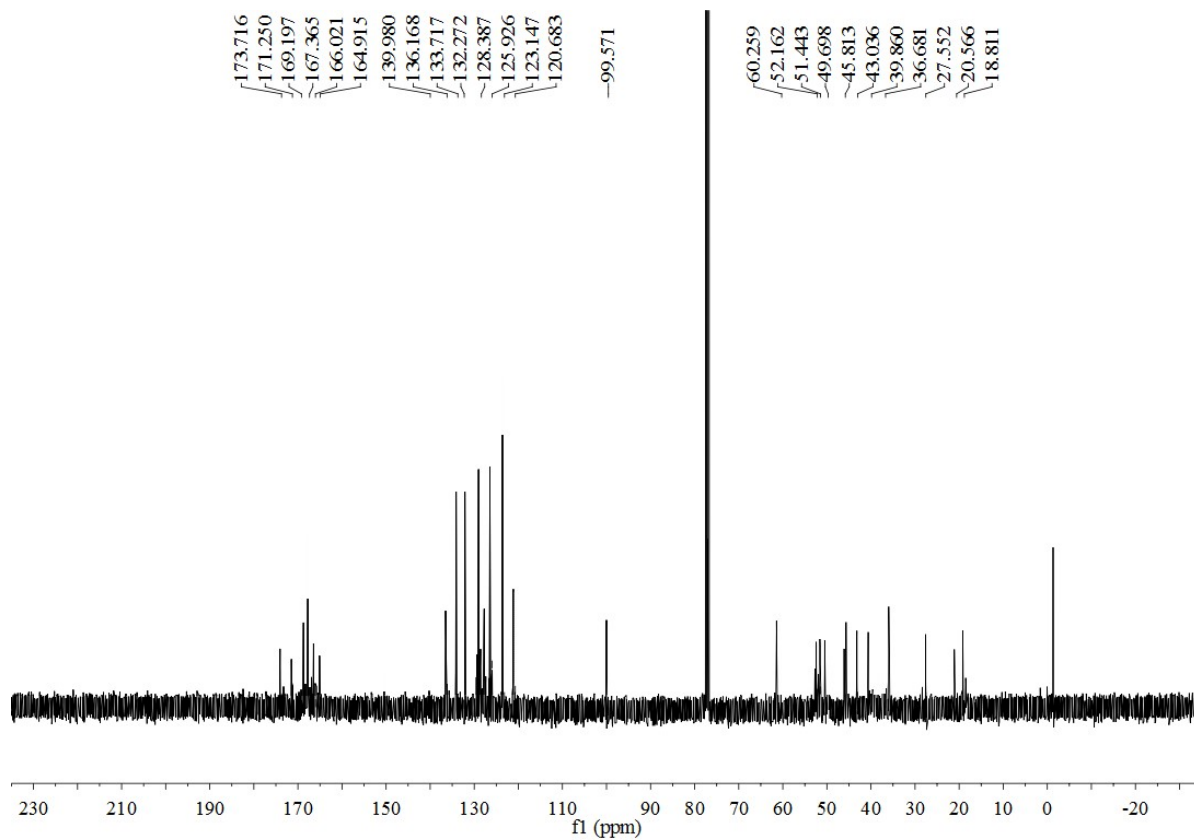

1-14 #24 RT: 0.13 AV: 1 NL: 7.84E6  
 T: FTMS + p ESI Full lock ms [150.0000-2250.0000]

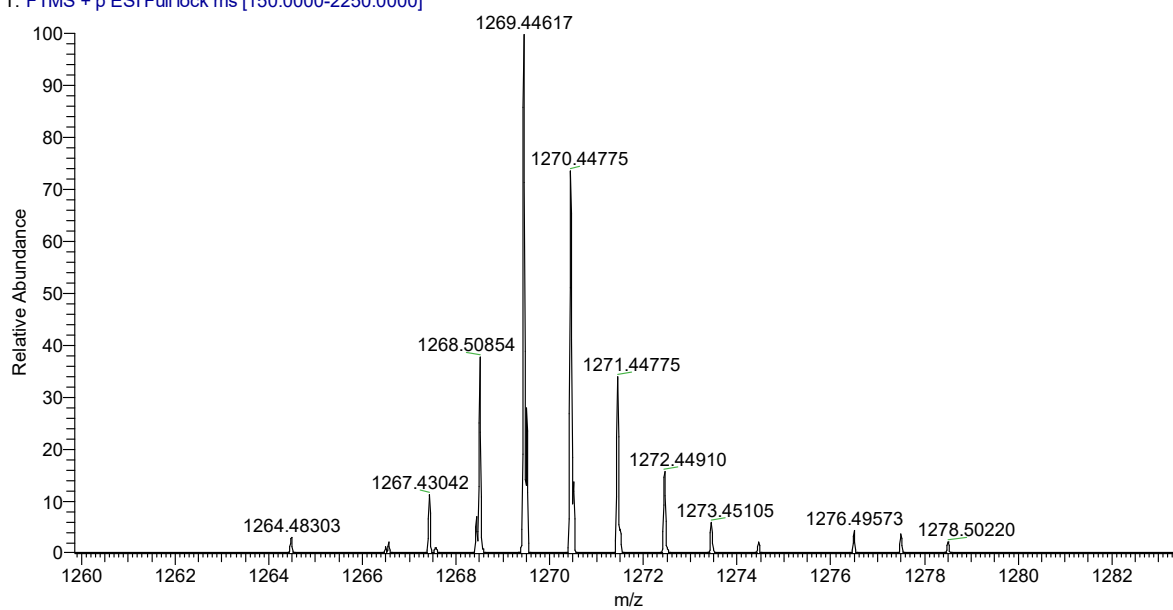

(11)  $^1\text{H}$ ,  $^{13}\text{C}$ -NMR and HRMS of **3f**.

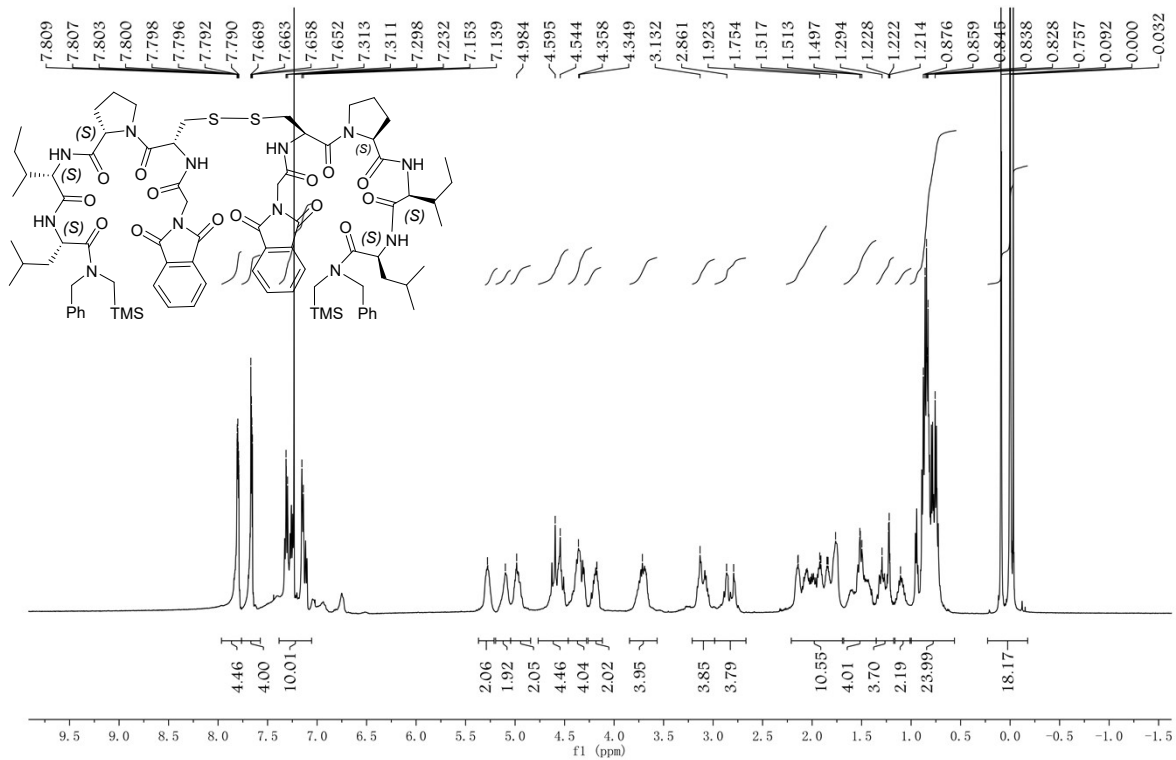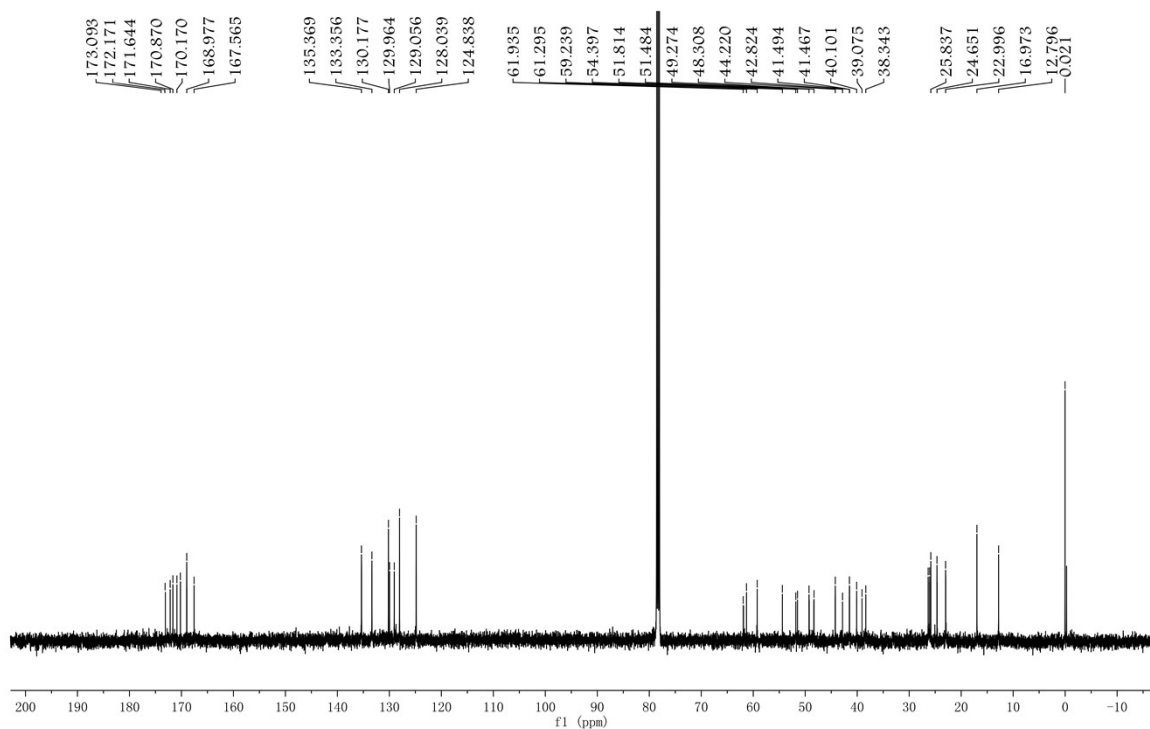

00077 #4-52 RT: 0.04-0.79 AV: 49 NL: 6.23E3  
T: FTMS + p ESI Full ms [150.00-2000.00]

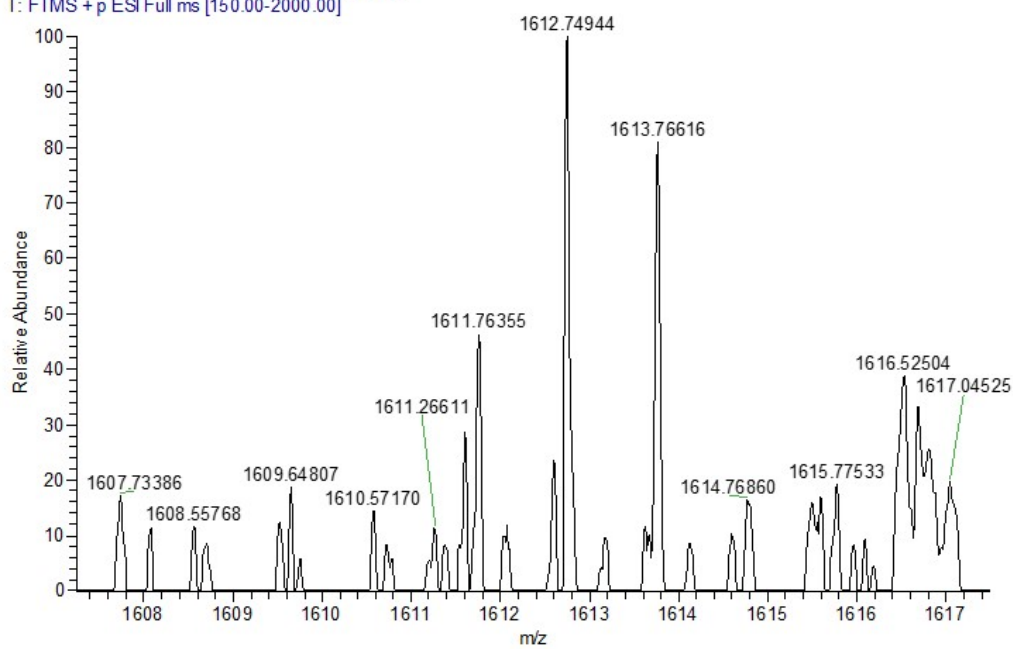

(12)  $^1\text{H}$ ,  $^{13}\text{C}$ -NMR and HRMS of **4f**.

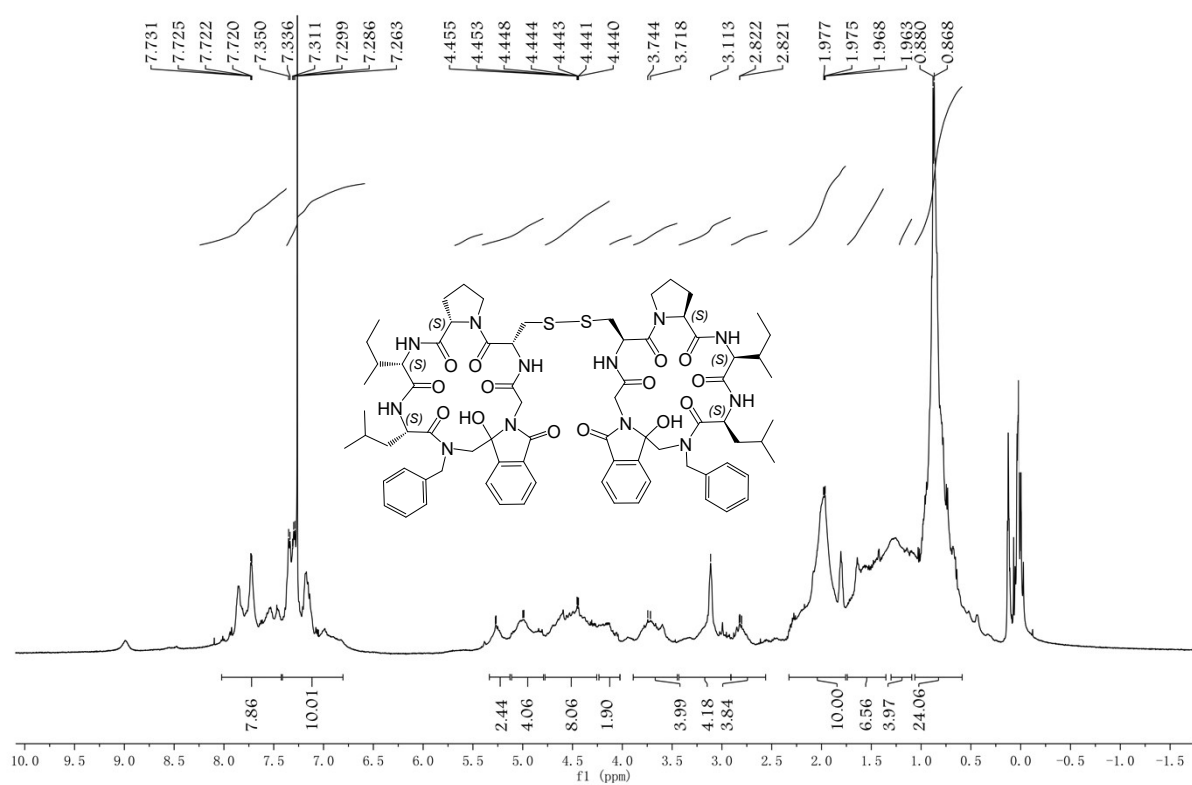

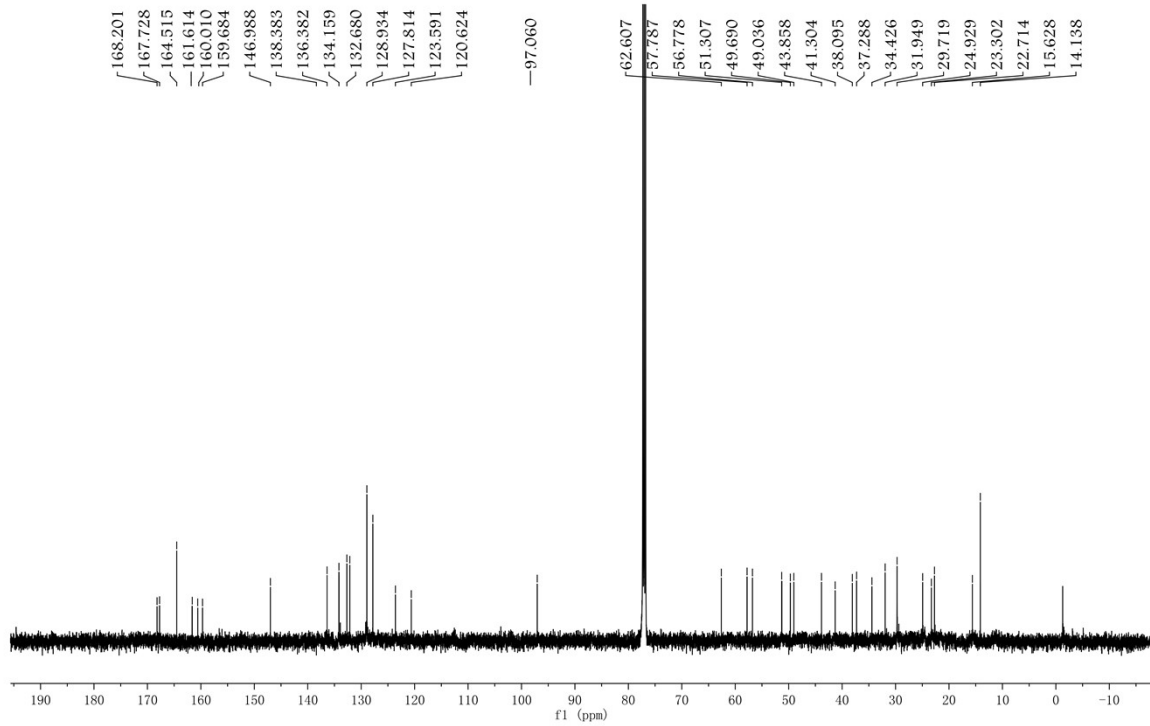

00076 #46 RT: 0.69 AV: 1 NL: 2.18E5  
 T: FTMS + p ESI Full ms [150.00-2000.00]

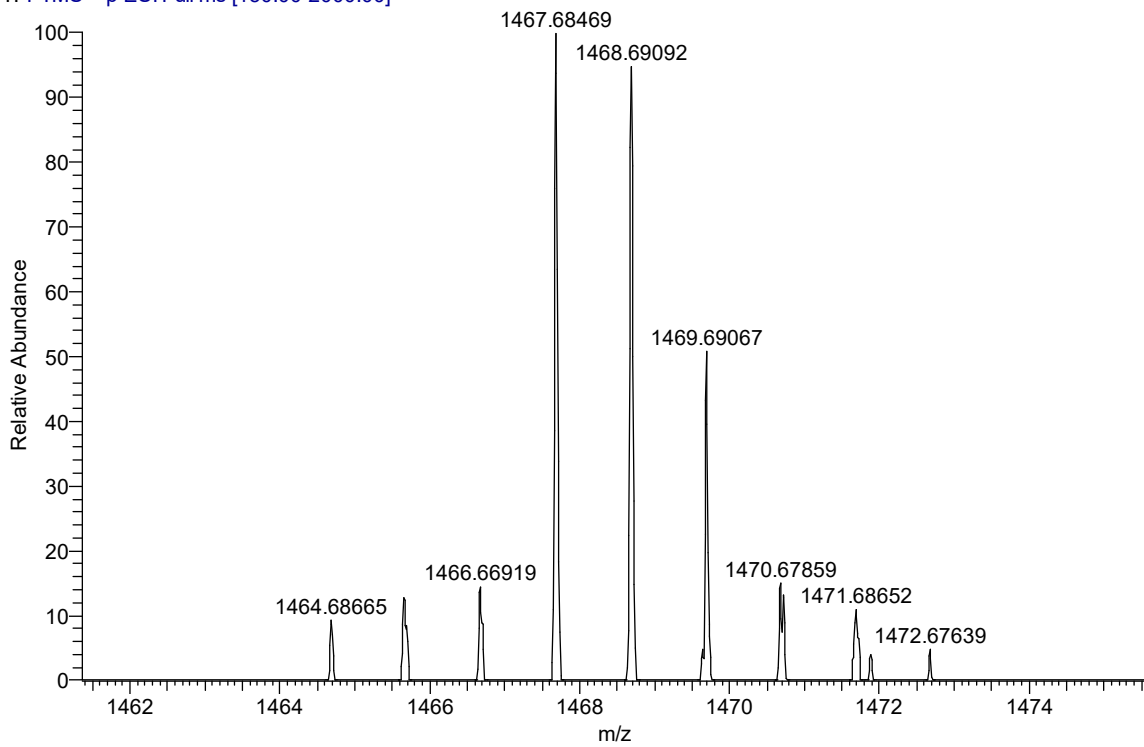

(13)  $^1\text{H}$ ,  $^{13}\text{C}$ -NMR and HRMS of **3g**.

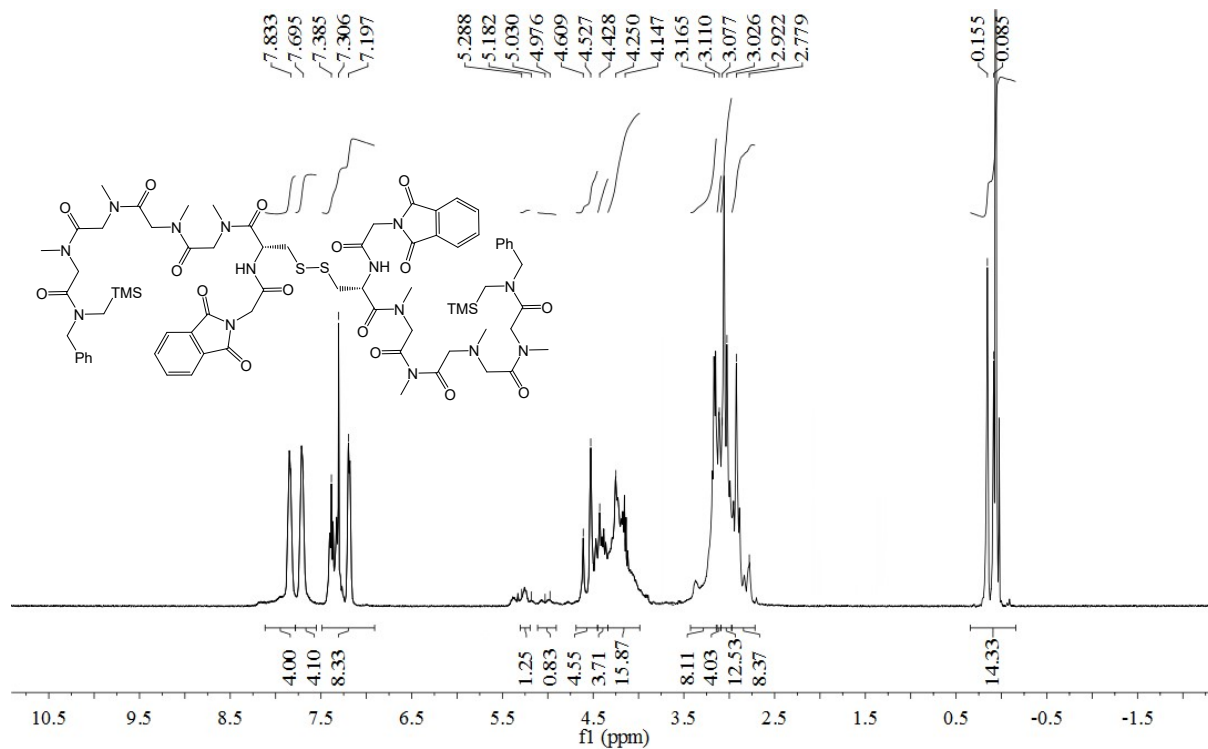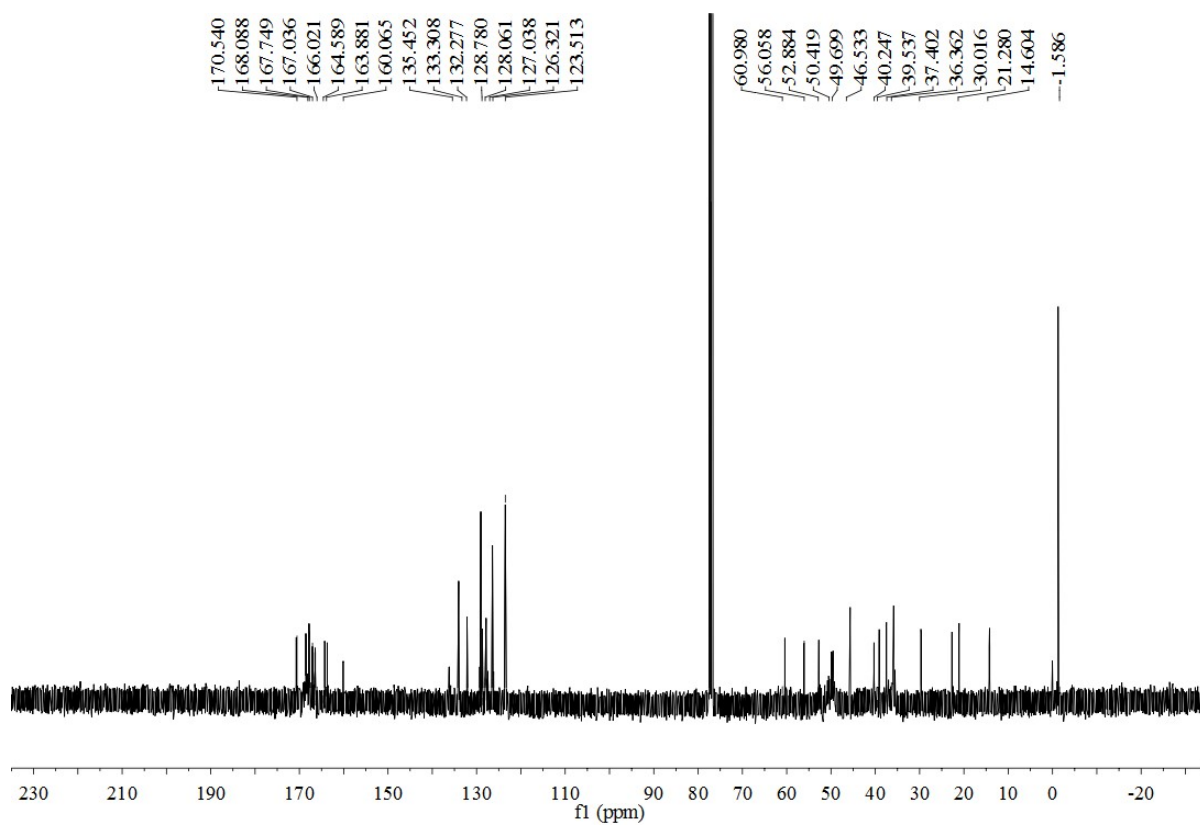

1-45 #21 RT: 0.12 AV: 1 NL: 1.27E8  
T: FTMS + p ESI Full lock ms [150.0000-2250.0000]

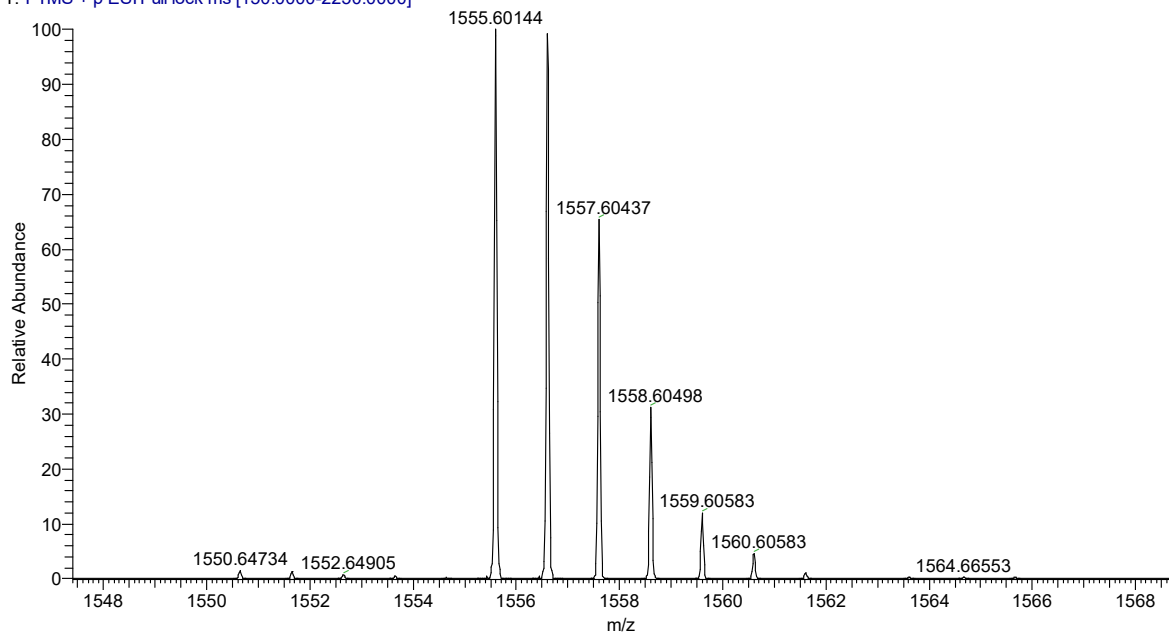

(14)  $^1\text{H}$ ,  $^{13}\text{C}$ -NMR and HRMS of **4g**.

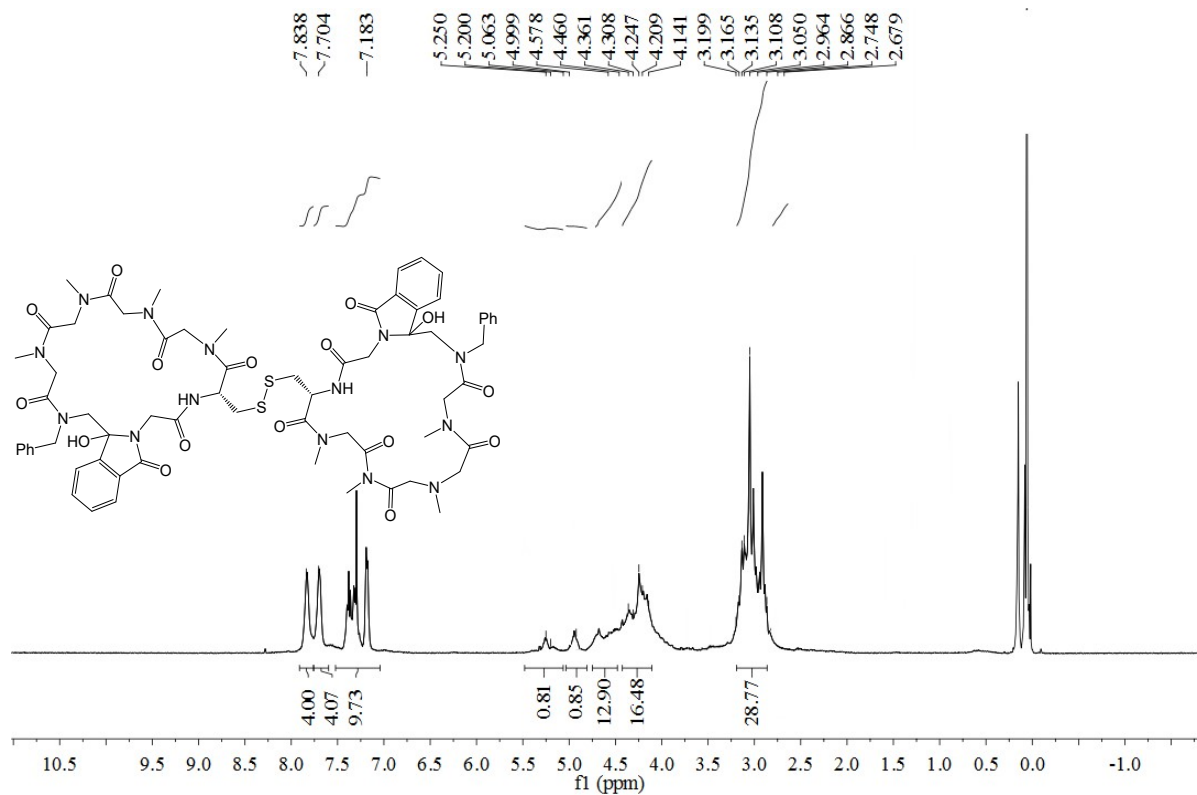



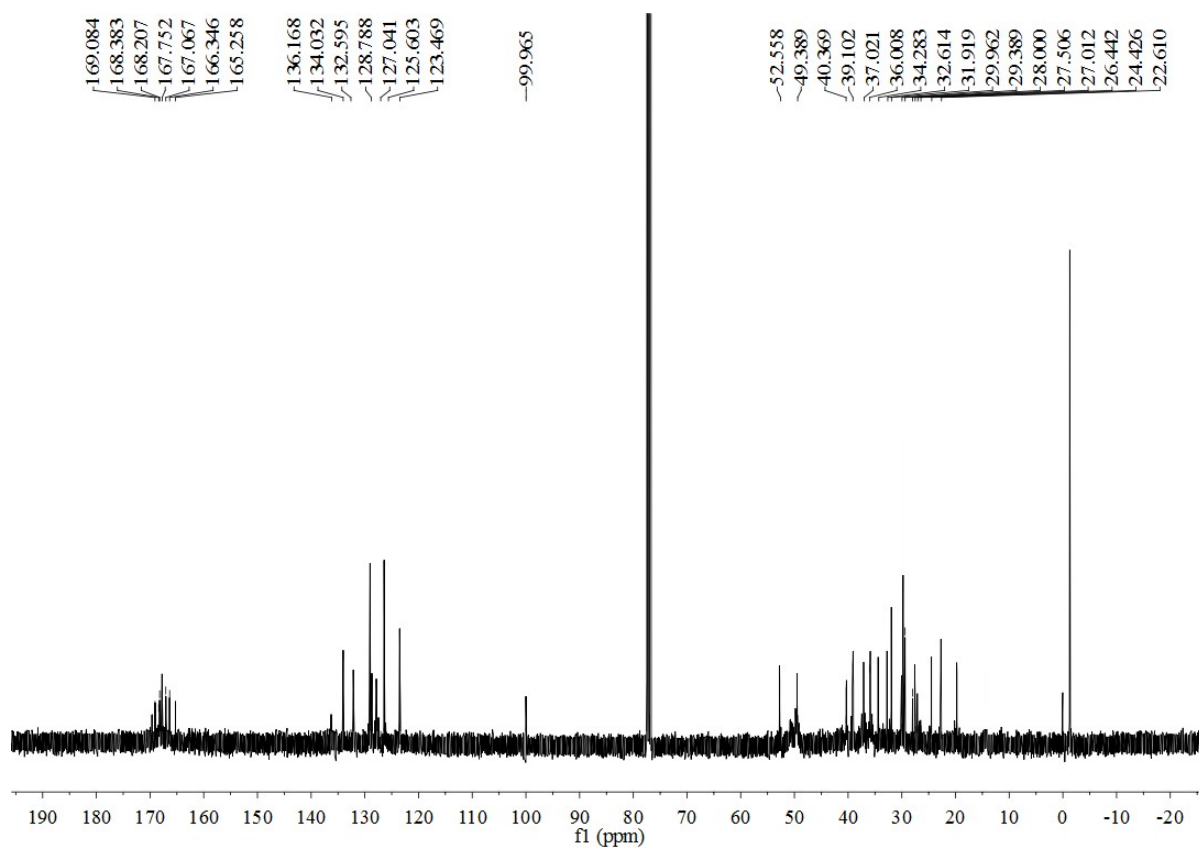

1.46 #17 RT: 0.10 AV: 1 NL: 9.31E5  
 T: FTMS + p ESI Full lock ms [150.0000-2250.00]

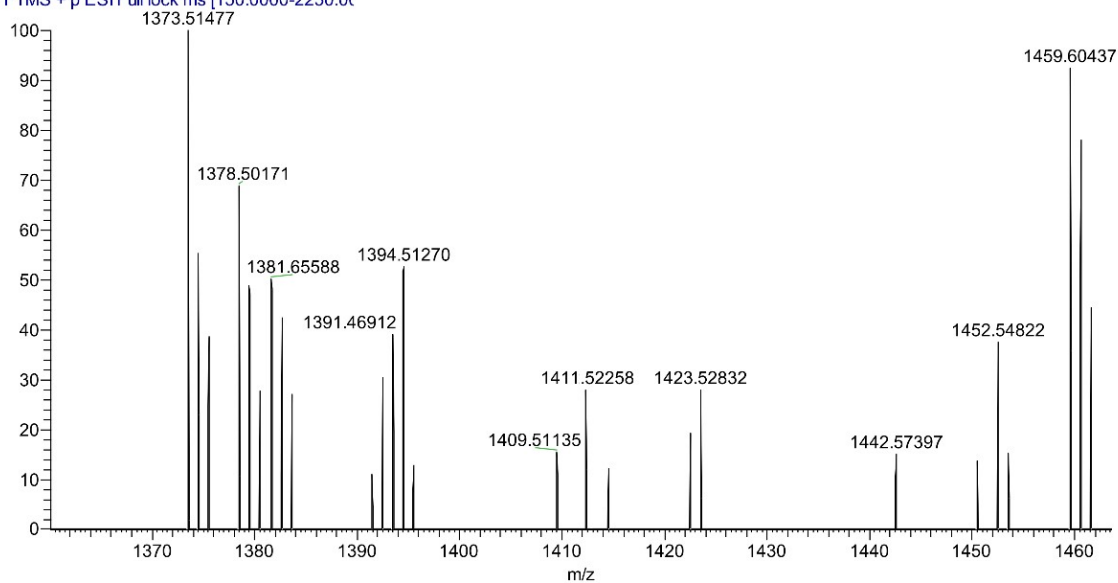

(15)  $^1\text{H}$ ,  $^{13}\text{C}$ -NMR and HRMS of **3h**.

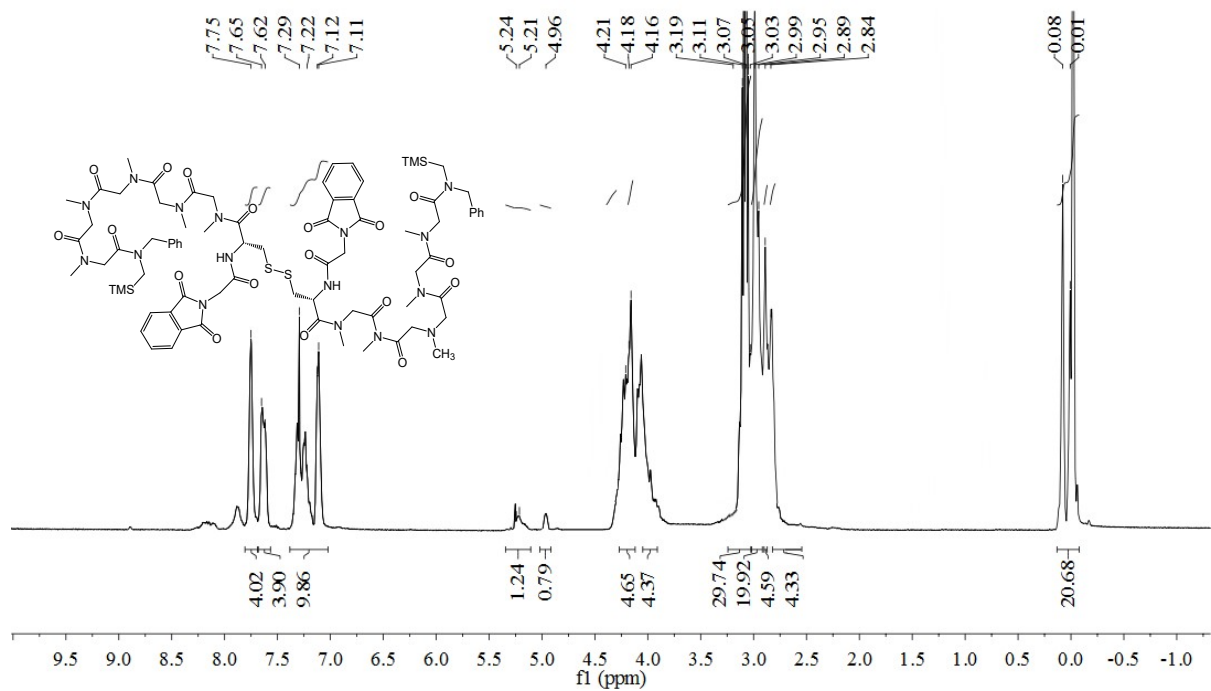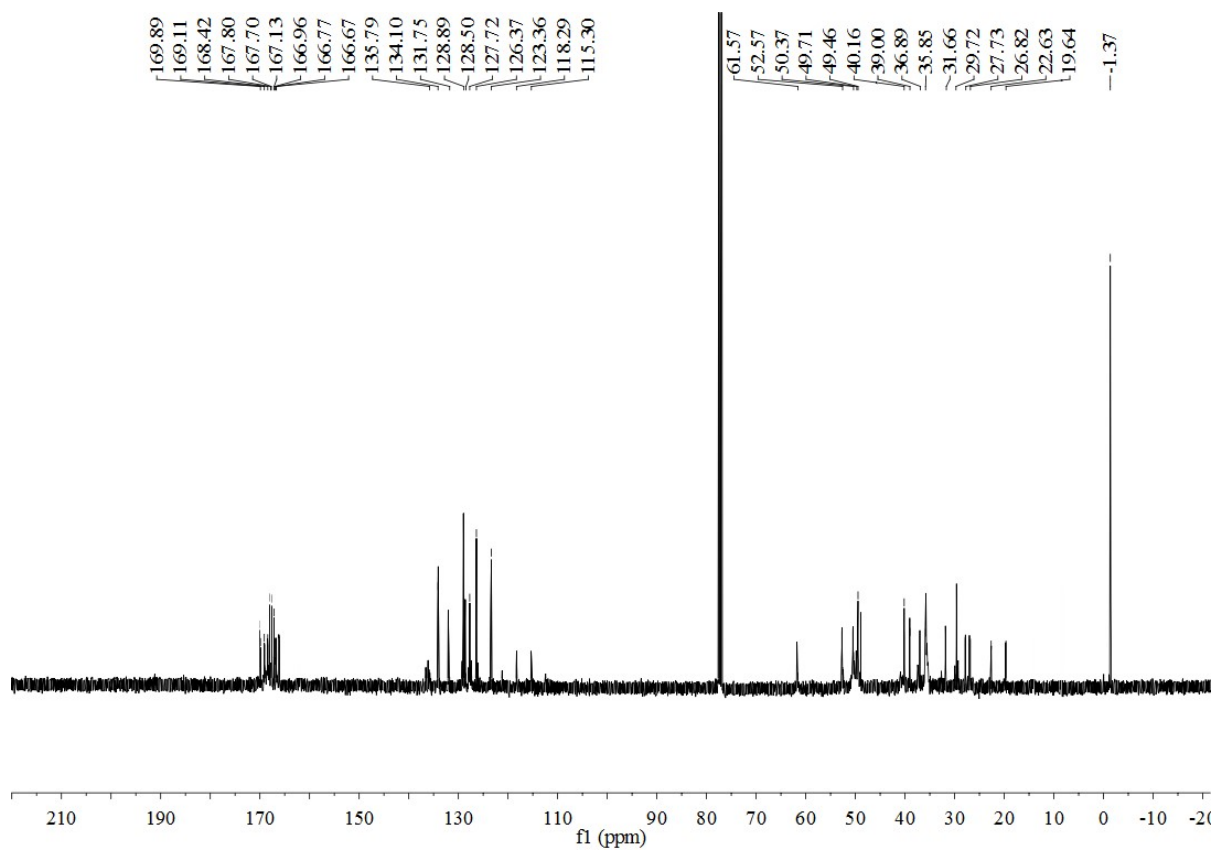

1-47 #15 RT: 0.09 AV: 1 NL: 2.68E5  
T: FTMS + p ESI Full lock ms [150.0000-2250.0000]

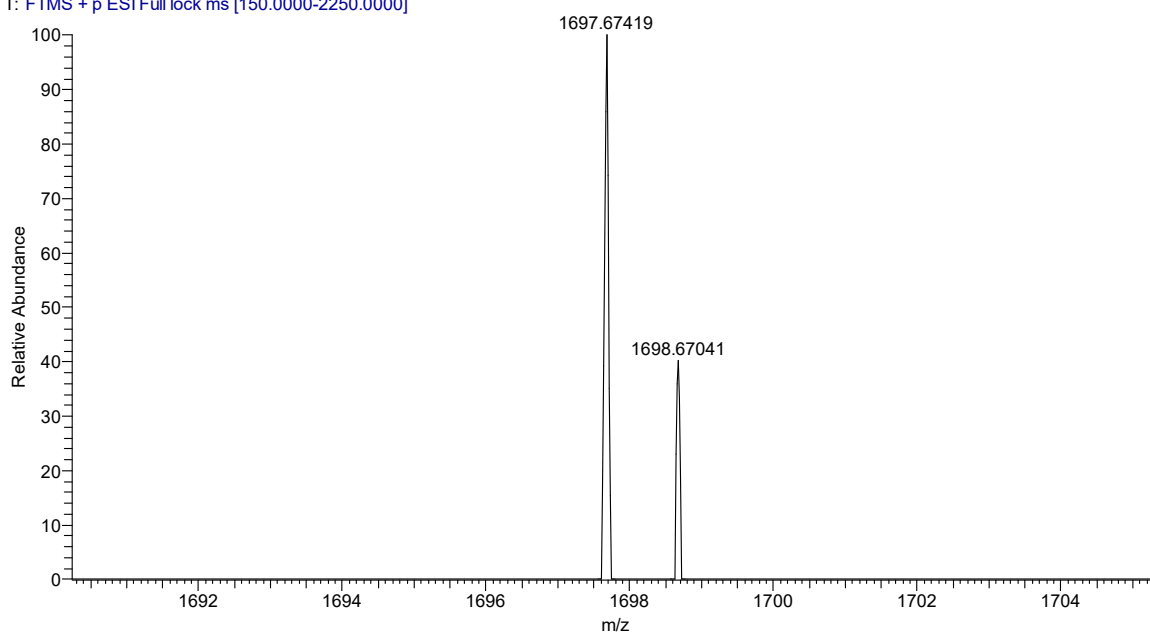

(16)  $^1\text{H}$ ,  $^{13}\text{C}$ -NMR and HRMS of **4h**.

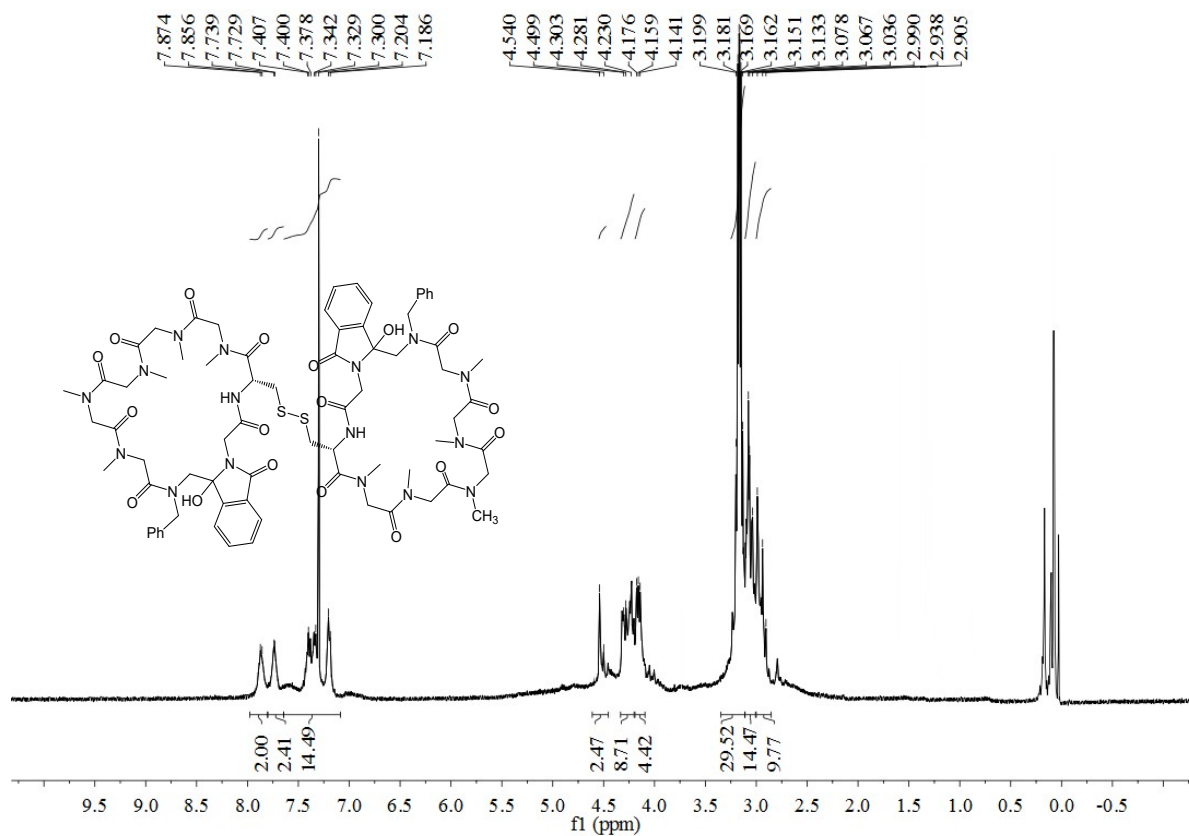

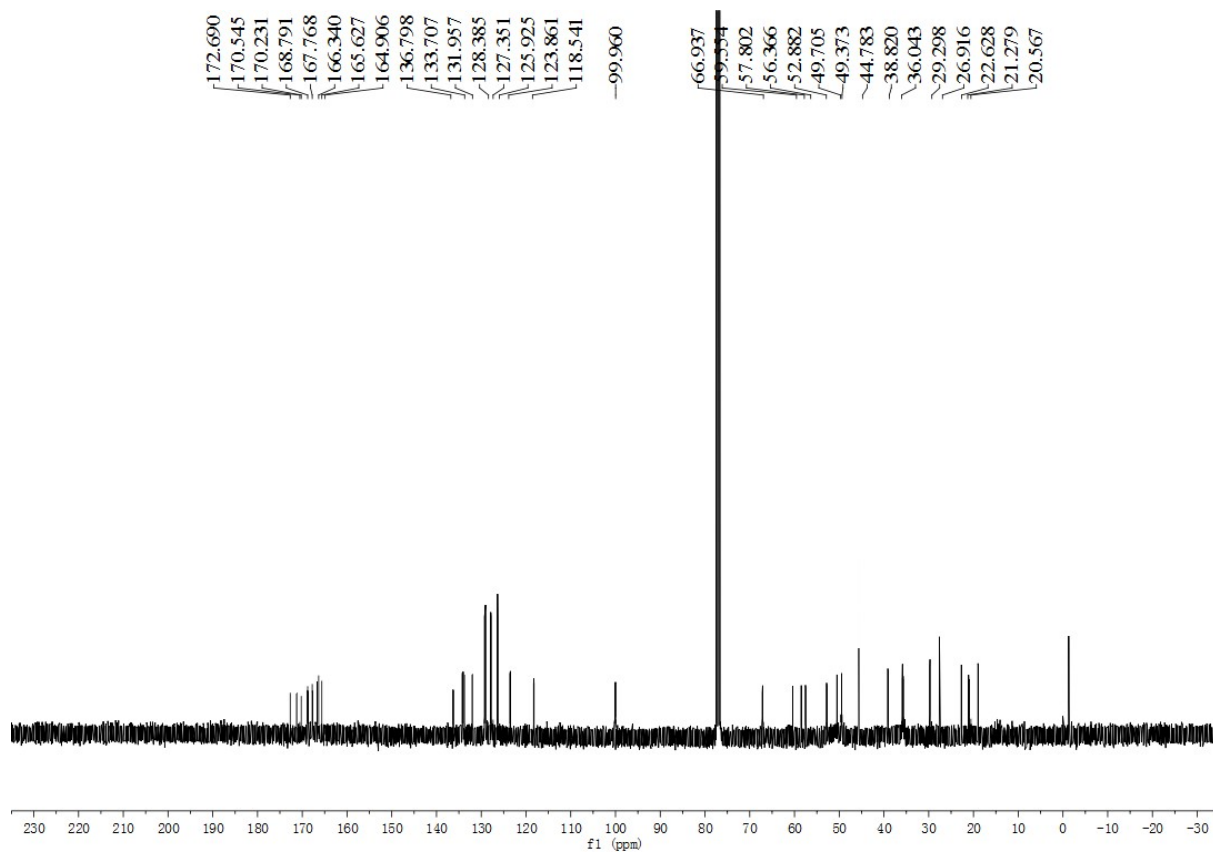

1-17 #27 RT: 0.15 AV: 1 NL: 3.87E5  
 T: FTMS + p ESI Full lock ms [150.0000-2250.0000]

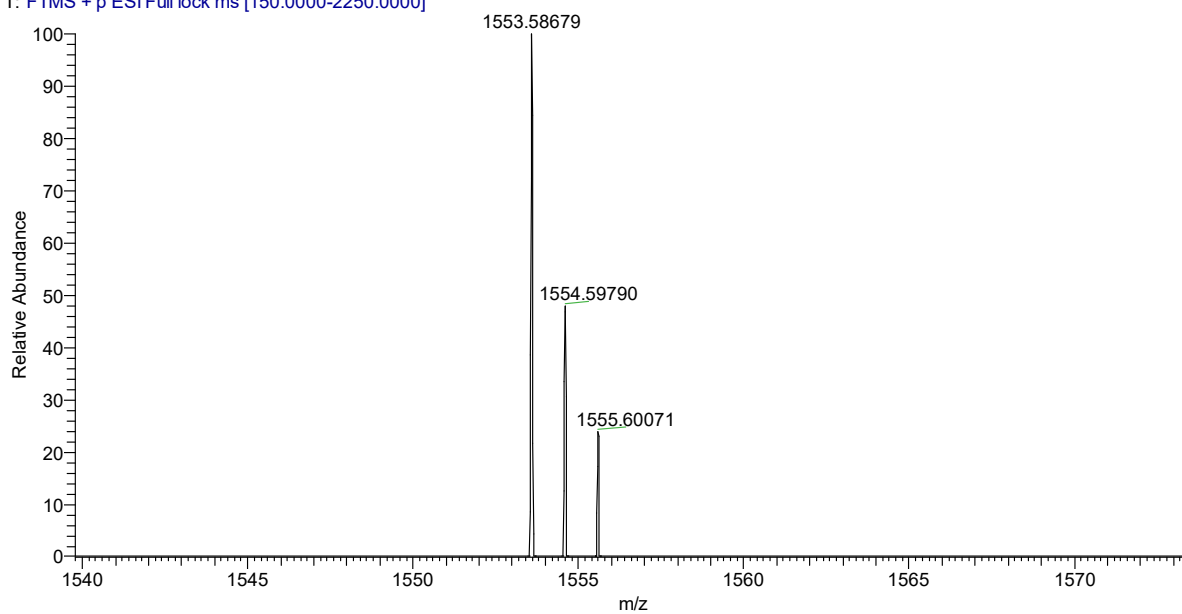

(17)  $^1\text{H}$ ,  $^{13}\text{C}$ -NMR and HRMS of **3i**.

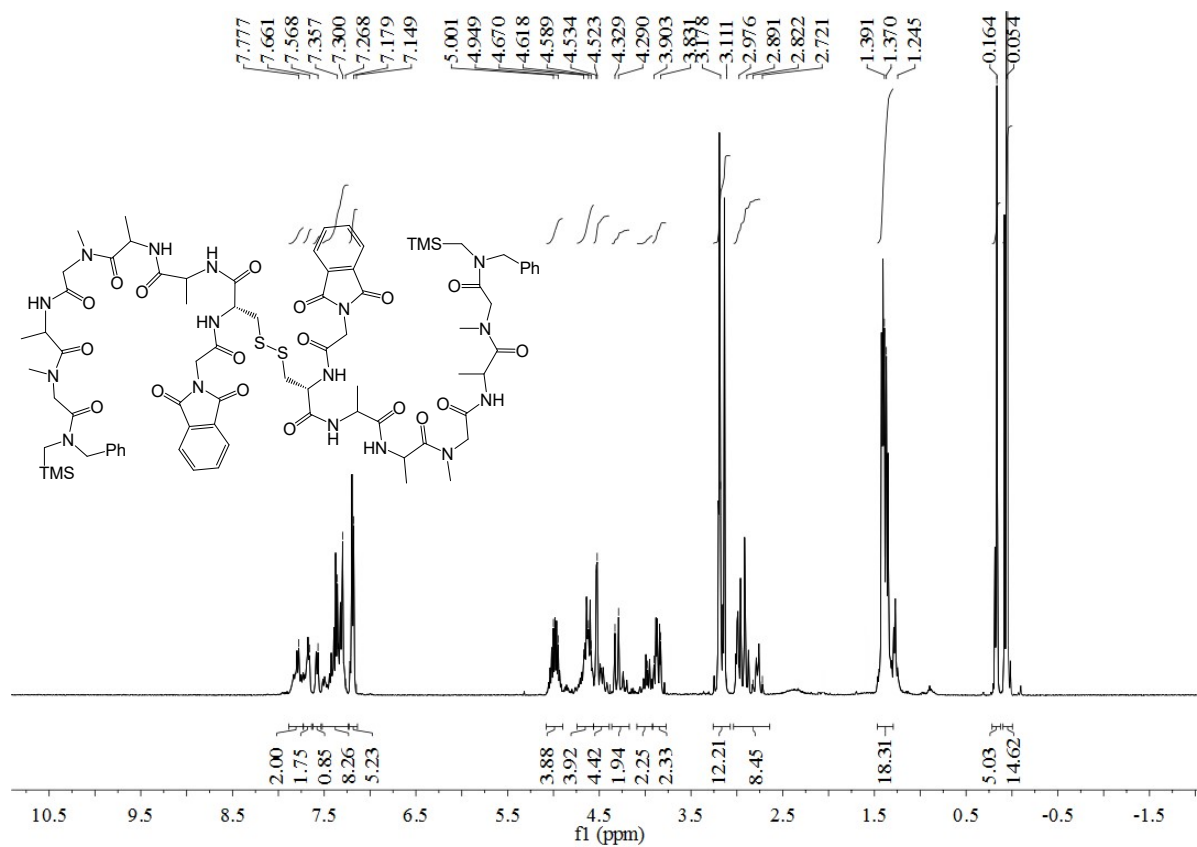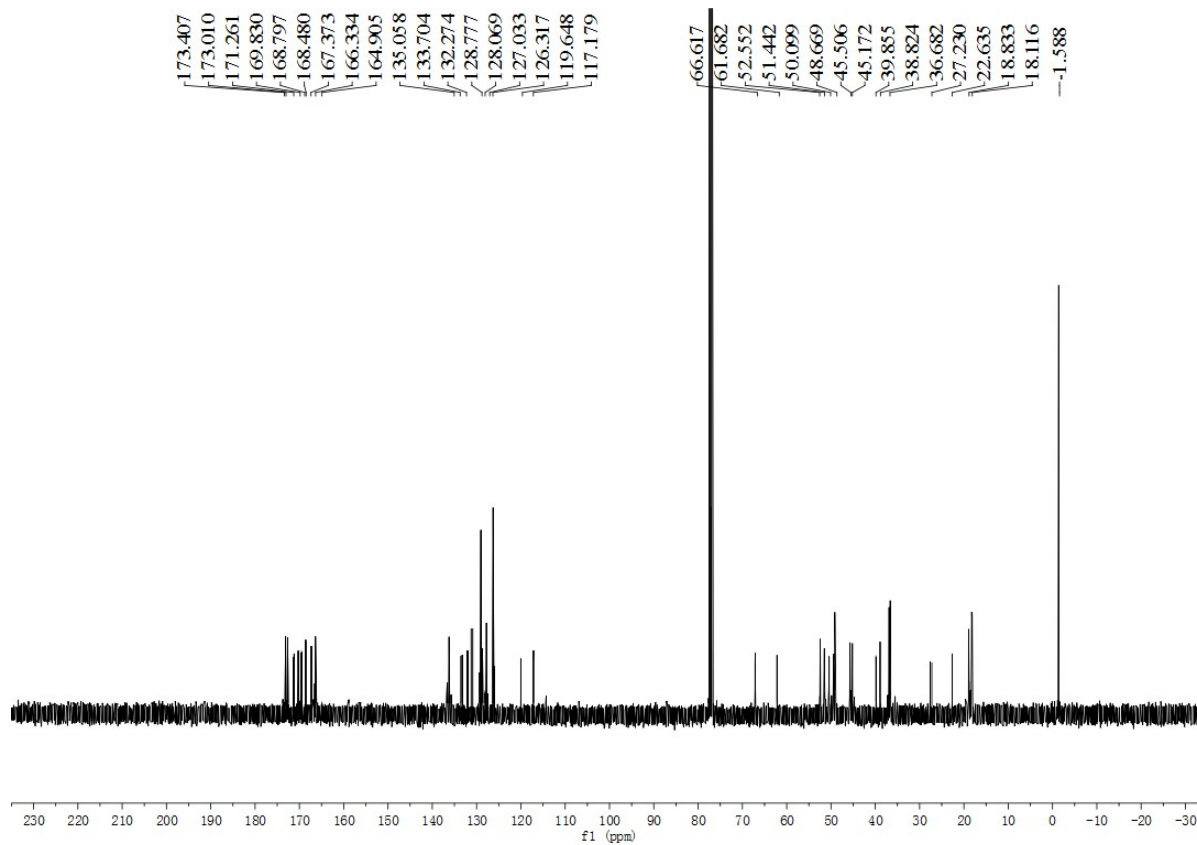

1-47 #15 RT: 0.09 AV: 1 NL: 2.68E5  
T: FTMS + p ESI Full lock ms [150.0000-2250.0000]

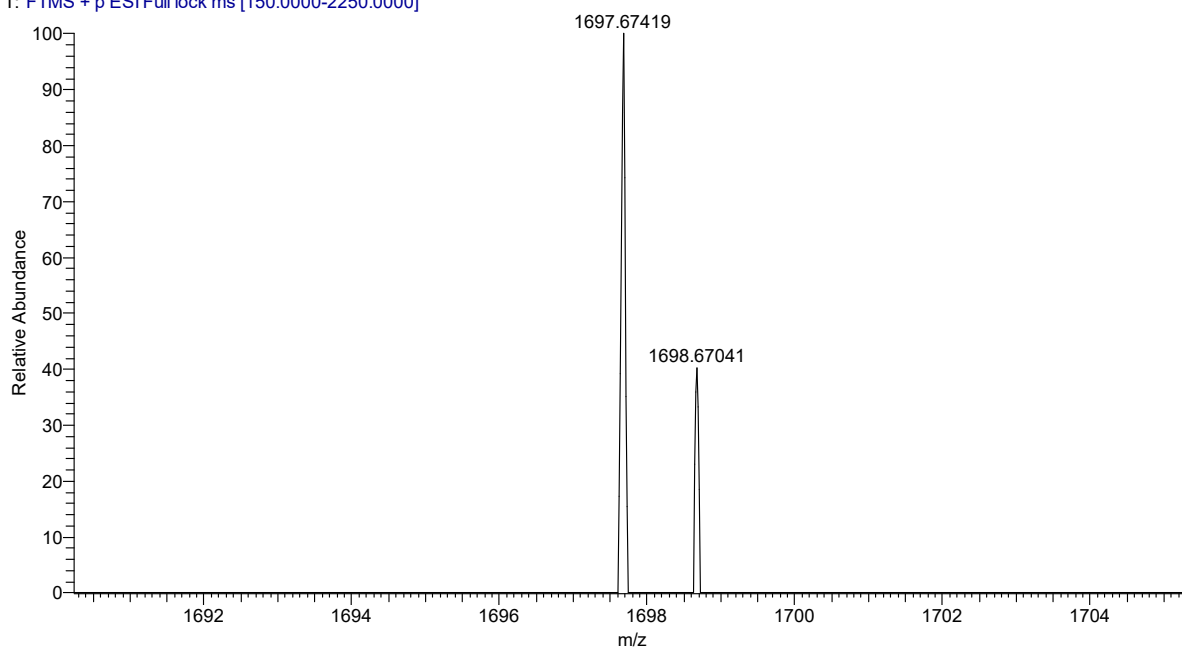

(18)  $^1\text{H}$ ,  $^{13}\text{C}$ -NMR and HRMS of **4i**.

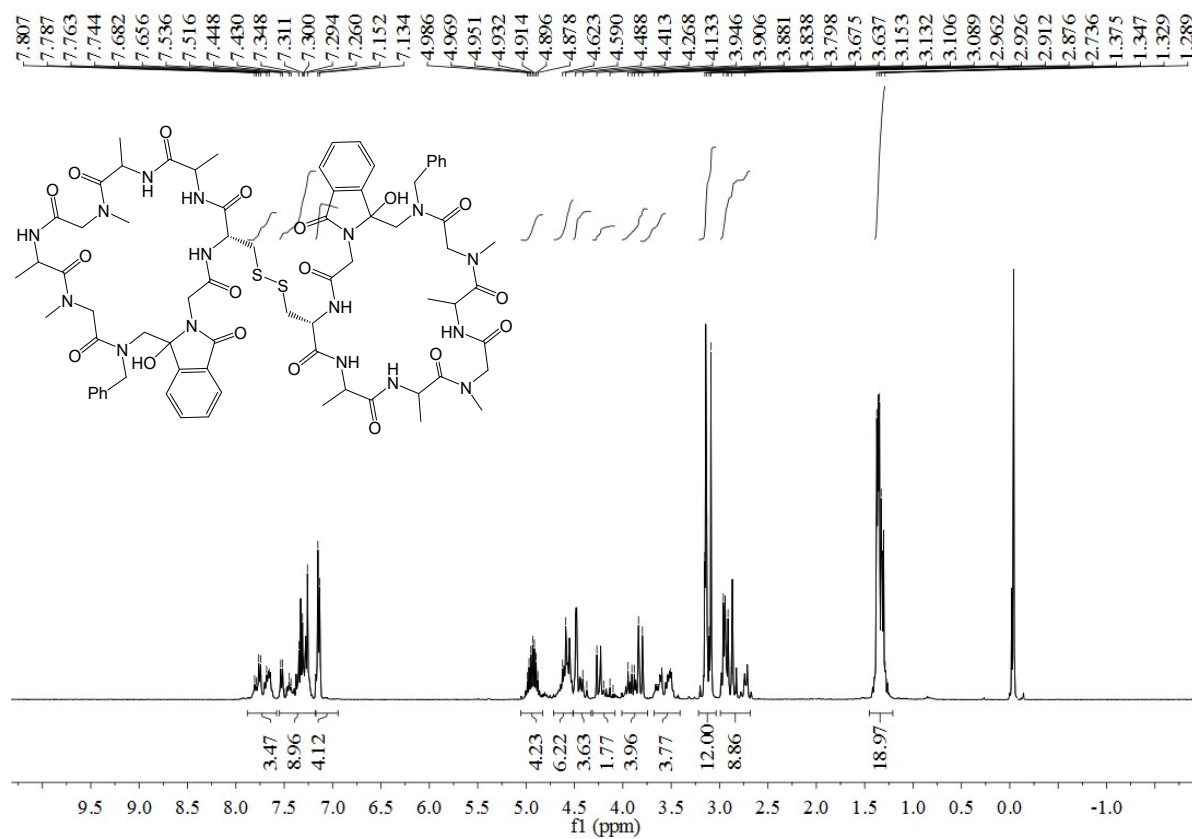

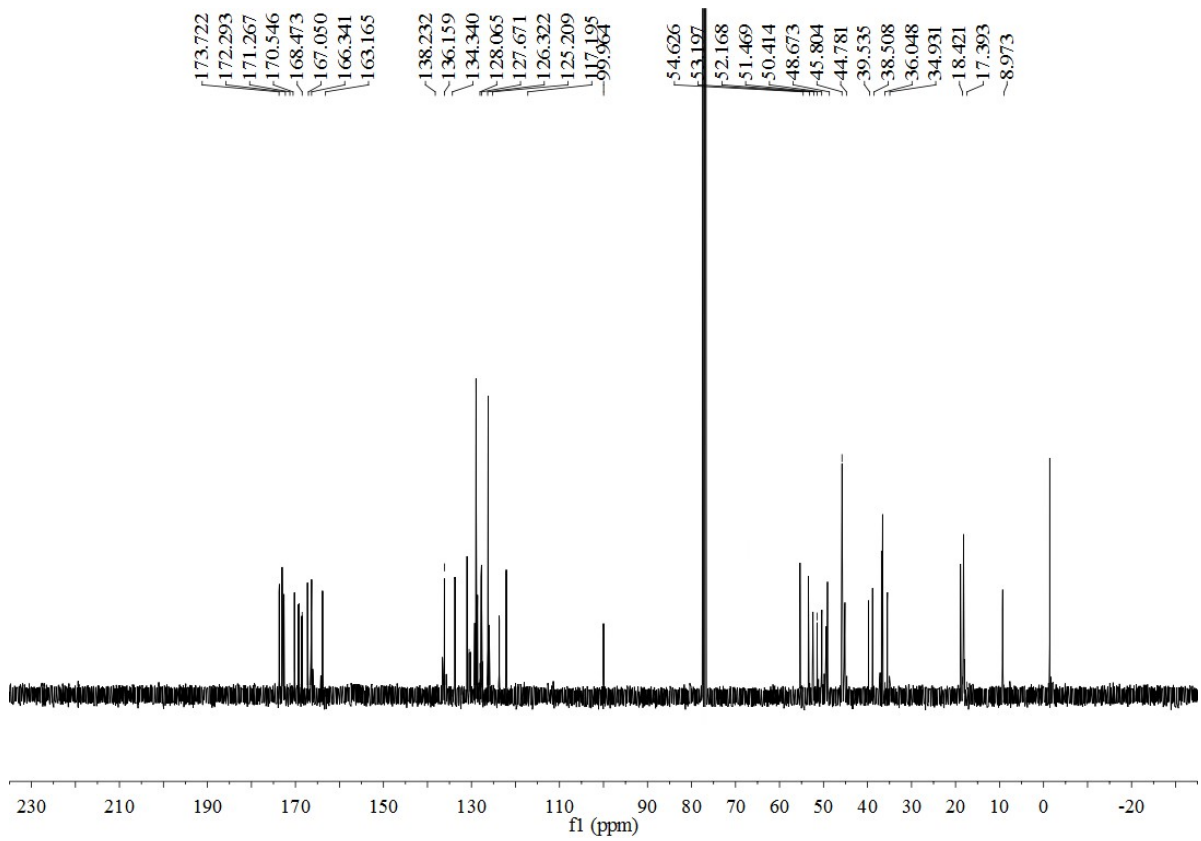

1-12 #29 RT: 0.16 AV: 1 NL: 4.70E5  
 T: FTMS + p ESI Full lock ms [150.0000-2250.0000]

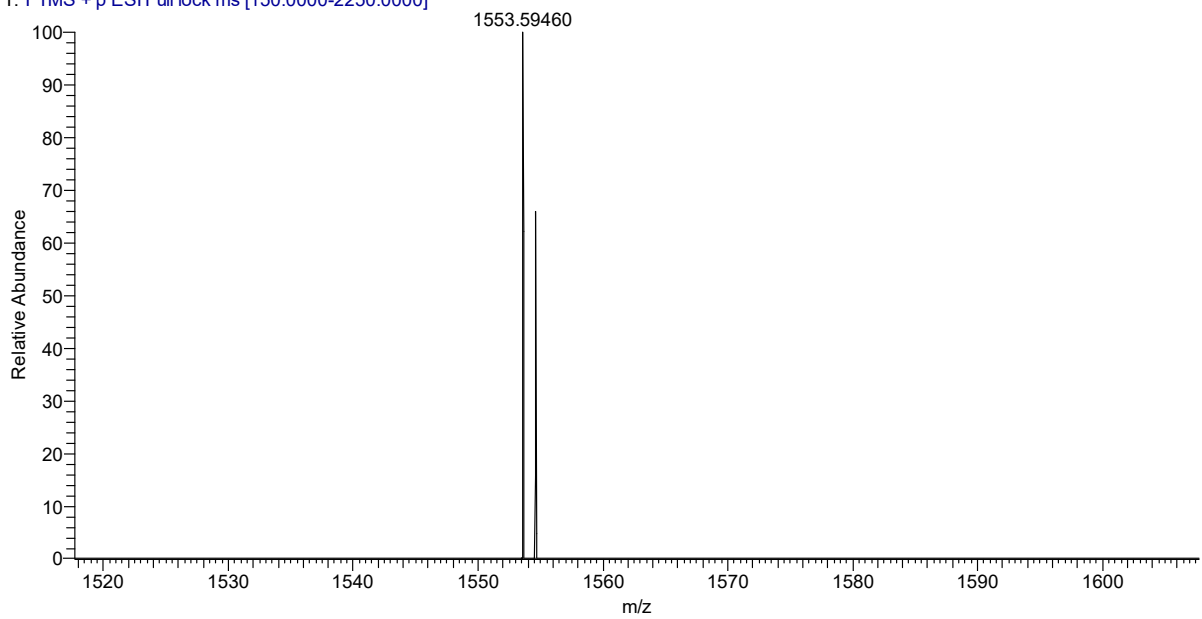

Supplement: d2nj00583b1.pdf [file d2nj00583b1.pdf]
